# Supplementary material for: NRF2 -617 C/A Polymorphism Impacts Proinflammatory Cytokine Levels, Survival, and Transplant-Related Mortality After Hematopoietic Stem Cell Transplantation in Adult Patients Receiving Busulfan-Based Conditioning Regimens
Source: Front Pharmacol. 2020 Dec 15;11:563321. doi: 10.3389/fphar.2020.563321 (PMC7770105; doi:10.3389/fphar.2020.563321)
Supplement: Supplementary file 6 [file datasheet1.xls]

## Sheet: Sheet1
Scenario	subject	IVAR	TAD	PRED	IPRED	DV	IRES	PREDSE	Weight	IWRES	WRES	CWRES	CdfDV	TADSeq	ObsName	ResetSeq	Var. Inf. factor
	10	72	0	139.032	42.7272	270	227.273		1	1.63171	0.275485	0.693463	0	7	CObs(ug/mL)	0
	10	72.5	0.5	535.091	429.971	415.5	-14.4708		1	-0.103894	-0.491772	-0.233176	0	7	CObs(ug/mL)	0
	10	73	1	887.007	756.861	807	50.1387		1	0.359972	0.604426	0.479048	0	7	CObs(ug/mL)	0
	10	73.5	1.5	1199.7	1032.8	1201.5	168.695		1	1.21115	0.84695	0.608227	0	7	CObs(ug/mL)	0
	10	74	2	1477.54	1265.74	1374	108.258		1	0.777244	-0.0625724	-0.428973	0	7	CObs(ug/mL)	0
	10	74.5	2.5	1312.86	1068.47	883.5	-184.972		1	-1.32801	-2.25721	-2.25516	0	7	CObs(ug/mL)	0
	10	75	3	1166.53	901.947	690	-211.947		1	-1.52168	-1.96704	-0.926631	0	7	CObs(ug/mL)	0
	10	76	4	920.99	642.713	610.5	-32.2129		1	-0.231274	-0.284639	0.833826	0	7	CObs(ug/mL)	0
	10	77	5	727.131	457.987	475.5	17.5132		1	0.125736	0.147649	0.784458	0	7	CObs(ug/mL)	0
	10	78	6	574.077	326.354	391.5	65.146		1	0.467717	0.414696	0.800535	0	7	CObs(ug/mL)	0
	10	80	8	357.837	165.715	241.5	75.7853		1	0.544103	0.445189	0.660022	0	7	CObs(ug/mL)	0
	10	82	10	223.049	84.1459	140.4	56.2541		1	0.403878	0.31241	0.435278	0	7	CObs(ug/mL)	0
	10	84	12	139.032	42.7272	101.7	58.9728		1	0.423397	0.361848	0.42891	0	7	CObs(ug/mL)	0
	12	72	0	165.101	192.35	343.5	151.15		1	1.08519	0.320025	0.328055	0	7	CObs(ug/mL)	0
	12	72.5	0.5	635.421	459.037	271.5	-187.537		1	-1.34642	-1.05436	-1.49204	0	7	CObs(ug/mL)	0
	12	73	1	1053.32	703.118	603	-100.118		1	-0.718797	0.824572	0.462322	0	7	CObs(ug/mL)	0
	12	73.5	1.5	1424.64	926.509	957	30.4912		1	0.218913	1.15633	1.05011	0	7	CObs(ug/mL)	0
	12	74	2	1754.58	1130.96	1017	-113.964		1	-0.818208	-0.163246	-0.179332	0	7	CObs(ug/mL)	0
	12	74.5	2.5	1559.02	1035.1	1204.5	169.403		1	1.21623	1.30742	1.50913	0	7	CObs(ug/mL)	0
	12	75	3	1385.26	947.356	1012.5	65.1441		1	0.467704	0.0117422	0.412534	0	7	CObs(ug/mL)	0
	12	76	4	1093.68	793.556	801	7.44401		1	0.0534445	-0.628409	-0.151609	0	7	CObs(ug/mL)	0
	12	77	5	863.468	664.725	652.5	-12.2249		1	-0.0877691	-0.5778	-0.288956	0	7	CObs(ug/mL)	0
	12	78	6	681.716	556.809	555	-1.80913		1	-0.0129887	-0.320225	-0.166478	0	7	CObs(ug/mL)	0
	12	80	8	424.932	390.693	334.5	-56.1925		1	-0.403436	-0.528289	-0.470083	0	7	CObs(ug/mL)	0
	13	72	0	173.791	268.537	433.5	164.963		1	1.18436	0.443944	0.385818	0	7	CObs(ug/mL)	0
	13	72.5	0.5	668.864	574.708	748.5	173.792		1	1.24775	-0.106146	-0.212112	0	7	CObs(ug/mL)	0
	13	73	1	1108.76	857.05	901.5	44.4498		1	0.319129	-0.621176	-0.655853	0	7	CObs(ug/mL)	0
	13	73.5	1.5	1499.62	1117.42	1258.5	141.081		1	1.01289	0.240101	0.320555	0	7	CObs(ug/mL)	0
	13	74	2	1846.93	1357.52	1270.5	-87.0248		1	-0.624797	-1.22011	-0.997675	0	7	CObs(ug/mL)	0
	13	74.5	2.5	1641.07	1251.87	1269	17.1256		1	0.122954	-0.736882	-0.207872	0	7	CObs(ug/mL)	0
	13	75	3	1458.17	1154.45	1072.5	-81.9463		1	-0.588336	-1.5368	-1.03349	0	7	CObs(ug/mL)	0
	13	76	4	1151.24	981.747	970.5	-11.2473		1	-0.0807504	-0.894595	-0.718824	0	7	CObs(ug/mL)	0
	13	77	5	908.913	834.883	766.5	-68.3831		1	-0.490959	-0.897631	-1.08777	0	7	CObs(ug/mL)	0
	13	78	6	717.596	709.989	657	-52.9891		1	-0.380437	-0.443965	-0.781066	0	7	CObs(ug/mL)	0
	13	80	8	447.296	513.456	456	-57.4564		1	-0.41251	-0.250975	-0.644113	0	7	CObs(ug/mL)	0
	13	82	10	278.812	371.326	333	-38.3262		1	-0.275164	-0.014888	-0.369523	0	7	CObs(ug/mL)	0
	13	84	12	173.791	268.539	231	-37.5391		1	-0.269513	0.016218	-0.293108	0	7	CObs(ug/mL)	0
	14	72	0	121.653	47.5924	367.5	319.908		1	2.29679	0.583389	1.04688	0	7	CObs(ug/mL)	0
	14	72.5	0.5	468.205	429.992	406.5	-23.4921		1	-0.168662	-0.528421	-0.136203	0	7	CObs(ug/mL)	0
	14	73	1	776.131	754.563	1038	283.437		1	2.03495	1.67626	1.57402	0	7	CObs(ug/mL)	0
	14	73.5	1.5	1049.74	1030.05	1326	295.95		1	2.12478	0.486582	0.238625	0	7	CObs(ug/mL)	0
	14	74	2	1292.85	1263.88	1069.5	-194.376		1	-1.39552	-2.59532	-3.05178	0	7	CObs(ug/mL)	0
	14	74.5	2.5	1148.75	1072.74	916.5	-156.244		1	-1.12176	-2.10867	-2.0292	0	7	CObs(ug/mL)	0
	14	75	3	1020.72	910.516	850.5	-60.0161		1	-0.430887	-1.40493	-0.431875	0	7	CObs(ug/mL)	0
	14	76	4	805.866	655.95	627	-28.9503		1	-0.207849	-1.14652	0.0692157	0	7	CObs(ug/mL)	0
	14	77	5	636.239	472.557	192	-280.557		1	-2.01427	-2.17666	-1.314	0	7	CObs(ug/mL)	0
	14	78	6	502.317	340.438	511.5	171.062		1	1.22815	1.33381	1.88136	0	7	CObs(ug/mL)	0
	14	80	8	313.108	176.687	313.5	136.813		1	0.982254	0.807851	1.17607	0	7	CObs(ug/mL)	0
	14	82	10	195.168	91.7003	166.5	74.7997		1	0.537026	0.328318	0.585719	0	7	CObs(ug/mL)	0
	14	84	12	121.653	47.5924	130.65	83.0576		1	0.596314	0.430102	0.605317	0	7	CObs(ug/mL)	0
	15	72	0	147.722	224.626	466.5	241.874		1	1.73654	0.63421	0.48594	0	7	CObs(ug/mL)	0
	15	72.5	0.5	568.534	720.226	741	20.7737		1	0.149145	0.0509333	0.00524008	0	7	CObs(ug/mL)	0
	15	73	1	942.445	1165.36	1087.5	-77.8608		1	-0.559004	0.173078	0.207265	0	7	CObs(ug/mL)	0
	15	73.5	1.5	1274.68	1565.17	1605	39.8317		1	0.285972	0.951122	1.00329	0	7	CObs(ug/mL)	0
	15	74	2	1569.89	1924.26	2085	160.735		1	1.154	1.13301	1.18879	0	7	CObs(ug/mL)	0
	15	74.5	2.5	1394.91	1728.32	1590	-138.322		1	-0.993084	-1.53293	-1.428	0	7	CObs(ug/mL)	0
	15	75	3	1239.44	1552.33	1471.5	-80.831		1	-0.580329	-0.975301	-0.929065	0	7	CObs(ug/mL)	0
	15	76	4	978.551	1252.29	1396.5	144.213		1	1.03538	0.411456	0.404868	0	7	CObs(ug/mL)	0
	15	77	5	772.576	1010.24	928.5	-81.7375		1	-0.586836	-1.16561	-1.20828	0	7	CObs(ug/mL)	0
	15	78	6	609.957	814.973	769.5	-45.4726		1	-0.326472	-0.54946	-0.613568	0	7	CObs(ug/mL)	0
	15	80	8	380.202	530.374	462	-68.3739		1	-0.490892	-0.527904	-0.586	0	7	CObs(ug/mL)	0
	15	82	10	236.99	345.161	352.5	7.33934		1	0.052693	0.0800051	0.0350714	0	7	CObs(ug/mL)	0
	15	84	12	147.722	224.626	204	-20.6262		1	-0.148086	-0.119129	-0.156465	0	7	CObs(ug/mL)	0
	17	72	0	173.791	209.945	387	177.055		1	1.27117	0.364458	0.352452	0	7	CObs(ug/mL)	0
	17	72.5	0.5	668.864	573.542	667.5	93.9578		1	0.674573	-0.236431	-0.327522	0	7	CObs(ug/mL)	0
	17	73	1	1108.76	903.38	927	23.6198		1	0.169579	-0.178629	-0.210959	0	7	CObs(ug/mL)	0
	17	73.5	1.5	1499.62	1202.59	1180.5	-22.0933		1	-0.15862	-0.150216	-0.105873	0	7	CObs(ug/mL)	0
	17	74	2	1846.93	1474.03	1680	205.975		1	1.4788	1.14091	1.22849	0	7	CObs(ug/mL)	0
	17	74.5	2.5	1641.07	1337.16	1245	-92.1648		1	-0.6617	-1.47674	-1.27582	0	7	CObs(ug/mL)	0
	17	75	3	1458.17	1213.01	1066.5	-146.512		1	-1.05188	-1.55273	-1.46494	0	7	CObs(ug/mL)	0
	17	76	4	1151.24	998.217	871.5	-126.717		1	-0.909769	-0.909208	-1.10067	0	7	CObs(ug/mL)	0
	17	77	5	908.913	821.458	906	84.5425		1	0.606975	0.712969	0.48126	0	7	CObs(ug/mL)	0
	17	78	6	717.596	675.998	666	-9.99767		1	-0.0717785	-0.0919027	-0.269254	0	7	CObs(ug/mL)	0
	17	80	8	447.296	457.789	364.5	-93.289		1	-0.669771	-0.557408	-0.71764	0	7	CObs(ug/mL)	0
	17	82	10	278.812	310.017	348	37.983		1	0.2727	0.421659	0.290787	0	7	CObs(ug/mL)	0
	17	84	12	173.791	209.945	201	-8.94506		1	-0.0642213	0.0479602	-0.068562	0	7	CObs(ug/mL)	0
	18	72	0	121.653	301.755	541.5	239.745		1	1.72126	0.996288	0.668337	0	7	CObs(ug/mL)	0
	18	72.5	0.5	468.205	620.397	705	84.6028		1	0.607408	0.128977	-0.176903	0	7	CObs(ug/mL)	0
	18	73	1	776.131	915.092	936	20.9077		1	0.150107	0.0566414	0.0854685	0	7	CObs(ug/mL)	0
	18	73.5	1.5	1049.74	1187.64	1137	-50.6399		1	-0.36357	-0.175426	0.022616	0	7	CObs(ug/mL)	0
	18	74	2	1292.85	1439.7	1444.5	4.79573		1	0.0344311	0.231324	0.551925	0	7	CObs(ug/mL)	0
	18	74.5	2.5	1148.75	1331.5	1371	39.4957		1	0.28356	-0.384544	0.240811	0	7	CObs(ug/mL)	0
	18	75	3	1020.72	1231.44	1225.5	-5.93601		1	-0.0426177	-1.07125	-0.364829	0	7	CObs(ug/mL)	0
	18	76	4	805.866	1053.3	1042.5	-10.7959		1	-0.0775096	-1.1952	-0.715045	0	7	CObs(ug/mL)	0
	18	77	5	636.239	900.926	946.5	45.5743		1	0.327202	-0.512434	-0.43254	0	7	CObs(ug/mL)	0
	18	78	6	502.317	770.597	681	-89.5974		1	-0.643267	-1.13153	-1.29123	0	7	CObs(ug/mL)	0
	18	80	8	313.108	563.773	507	-56.7735		1	-0.407607	-0.491823	-0.828952	0	7	CObs(ug/mL)	0
	18	82	10	195.168	412.46	313.5	-98.9599		1	-0.710485	-0.566542	-0.903915	0	7	CObs(ug/mL)	0
	18	84	12	121.653	301.758	240	-61.758		1	-0.443394	-0.186282	-0.483964	0	7	CObs(ug/mL)	0
	19	72	0	147.722	383.591	528	144.409		1	1.03679	0.756564	0.516674	0	7	CObs(ug/mL)	0
	19	72.5	0.5	568.534	771.158	784.5	13.3418		1	0.0957879	0.0870747	-0.138223	0	7	CObs(ug/mL)	0
	19	73	1	942.445	1130.19	1204.5	74.3111		1	0.533518	0.458915	0.494123	0	7	CObs(ug/mL)	0
	19	73.5	1.5	1274.68	1462.78	1483.5	20.716		1	0.148731	-0.141394	0.00646394	0	7	CObs(ug/mL)	0
	19	74	2	1569.89	1770.89	1845	74.1103		1	0.532077	0.100894	0.344142	0	7	CObs(ug/mL)	0
	19	74.5	2.5	1394.91	1640.5	1590	-50.4978		1	-0.36255	-1.13281	-0.657041	0	7	CObs(ug/mL)	0
	19	75	3	1239.44	1519.71	1471.5	-48.2066		1	-0.346101	-1.04805	-0.596037	0	7	CObs(ug/mL)	0
	19	76	4	978.551	1304.15	1212	-92.1514		1	-0.661603	-1.05942	-0.923488	0	7	CObs(ug/mL)	0
	19	77	5	772.576	1119.17	1158	38.8295		1	0.278778	0.167418	0.0286537	0	7	CObs(ug/mL)	0
	19	78	6	609.957	960.427	961.5	1.07273		1	0.0077017	-0.0481695	-0.264168	0	7	CObs(ug/mL)	0
	19	80	8	380.202	707.296	619.5	-87.7956		1	-0.630331	-0.433918	-0.781609	0	7	CObs(ug/mL)	0
	19	82	10	236.99	520.88	490.5	-30.3797		1	-0.218112	0.143517	-0.228407	0	7	CObs(ug/mL)	0
	19	84	12	147.722	383.596	394.5	10.9041		1	0.0782865	0.47172	0.0856574	0	7	CObs(ug/mL)	0
	20	72	0	139.032	162.265	372	209.735		1	1.50579	0.490038	0.464957	0	7	CObs(ug/mL)	0
	20	72.5	0.5	535.091	510.098	681	170.902		1	1.227	0.0958873	0.0546779	0	7	CObs(ug/mL)	0
	20	73	1	887.007	822.886	629	-193.886		1	-1.39201	-1.25108	-1.25186	0	7	CObs(ug/mL)	0
	20	73.5	1.5	1199.7	1104.16	1020	-84.1607		1	-0.604234	0.550798	0.595541	0	7	CObs(ug/mL)	0
	20	74	2	1477.54	1357.1	1400	42.9026		1	0.30802	1.10928	1.1836	0	7	CObs(ug/mL)	0
	20	74.5	2.5	1312.86	1220.37	1310	89.6293		1	0.643496	0.314349	0.504538	0	7	CObs(ug/mL)	0
	20	75	3	1166.53	1097.42	1150	52.5808		1	0.377505	-0.495929	-0.259297	0	7	CObs(ug/mL)	0
	20	76	4	920.99	887.43	869	-18.4299		1	-0.132318	-1.23344	-1.08617	0	7	CObs(ug/mL)	0
	20	77	5	727.131	717.622	692	-25.6217		1	-0.183952	-0.933618	-0.928052	0	7	CObs(ug/mL)	0
	20	78	6	574.077	580.306	574	-6.30602		1	-0.0452742	-0.526261	-0.562727	0	7	CObs(ug/mL)	0
	20	80	8	357.837	379.472	301	-78.4723		1	-0.563394	-0.82047	-0.868125	0	7	CObs(ug/mL)	0
	20	82	10	223.049	248.144	129	-119.144		1	-0.855395	-0.904543	-0.933501	0	7	CObs(ug/mL)	0
	20	84	12	139.032	162.265	167	4.73452		1	0.0339916	0.0534525	0.0359294	0	7	CObs(ug/mL)	0
	21	72	0	139.032	145.198	320	174.802		1	1.25499	0.380658	0.409639	0	7	CObs(ug/mL)	0
	21	72.5	0.5	535.091	416.016	414	-2.01617		1	-0.0144751	-0.560007	-0.715236	0	7	CObs(ug/mL)	0
	21	73	1	887.007	660.949	611	-49.9494		1	-0.358613	0.0214988	-0.125573	0	7	CObs(ug/mL)	0
	21	73.5	1.5	1199.7	882.472	742	-140.472		1	-1.00852	-0.158917	-0.189907	0	7	CObs(ug/mL)	0
	21	74	2	1477.54	1082.82	1220	137.179		1	0.984878	1.53793	1.56442	0	7	CObs(ug/mL)	0
	21	74.5	2.5	1312.86	979.325	1130	150.675		1	1.08177	0.634417	0.810275	0	7	CObs(ug/mL)	0
	21	75	3	1166.53	885.722	726	-159.722		1	-1.14673	-1.69277	-1.50746	0	7	CObs(ug/mL)	0
	21	76	4	920.99	724.499	732	7.50107		1	0.0538541	-0.29541	-0.234524	0	7	CObs(ug/mL)	0
	21	77	5	727.131	592.623	541	-51.6226		1	-0.370626	-0.550406	-0.564795	0	7	CObs(ug/mL)	0
	21	78	6	574.077	484.751	478	-6.75097		1	-0.0484688	-0.0835258	-0.124113	0	7	CObs(ug/mL)	0
	21	80	8	357.837	324.339	313	-11.3393		1	-0.0814111	-0.0749658	-0.121489	0	7	CObs(ug/mL)	0
	21	82	10	223.049	217.01	234	16.9896		1	0.121977	0.137581	0.0907743	0	7	CObs(ug/mL)	0
	21	84	12	139.032	145.198	109	-36.1983		1	-0.259887	-0.234286	-0.276362	0	7	CObs(ug/mL)	0
	23	72	0	156.412	74.1792	108.96	34.7811		1	0.249712	-0.0895318	-0.0722751	0	7	CObs(ug/mL)	0
	23	72.5	0.5	601.978	398.157	727.555	329.398		1	2.36492	0.363974	0.573585	0	7	CObs(ug/mL)	0
	23	73	1	997.883	680.737	659.905	-20.8316		1	-0.149561	-1.94041	-1.91716	0	7	CObs(ug/mL)	0
	23	73.5	1.5	1349.66	927.21	763.369	-163.841		1	-1.1763	-1.27255	-1.40102	0	7	CObs(ug/mL)	0
	23	74	2	1662.23	1142.19	1163.3	21.1079		1	0.151545	0.4888	0.32881	0	7	CObs(ug/mL)	0
	23	74.5	2.5	1476.97	996.243	1053.86	57.6211		1	0.413693	0.0404125	-0.129177	0	7	CObs(ug/mL)	0
	23	75	3	1312.35	868.945	817.091	-51.8544		1	-0.37229	-0.977196	-1.03213	0	7	CObs(ug/mL)	0
	23	76	4	1036.11	661.069	667.864	6.79505		1	0.0487853	-0.602597	-0.480785	0	7	CObs(ug/mL)	0
	23	77	5	818.022	502.923	512.668	9.74558		1	0.0699687	-0.444745	-0.308704	0	7	CObs(ug/mL)	0
	23	78	6	645.837	382.609	339.565	-43.0441		1	-0.309036	-0.626682	-0.523961	0	7	CObs(ug/mL)	0
	23	80	8	402.567	221.444	182.977	-38.4676		1	-0.276179	-0.409714	-0.348521	0	7	CObs(ug/mL)	0
	23	82	10	250.93	128.166	105.18	-22.9863		1	-0.165031	-0.207688	-0.181587	0	7	CObs(ug/mL)	0
	23	84	12	156.412	74.1792	63.9933	-10.1859		1	-0.07313	-0.0828144	-0.0753318	0	7	CObs(ug/mL)	0
	24	72	0	139.032	240.75	333	92.2501		1	0.662312	0.408003	0.309048	0	7	CObs(ug/mL)	0
	24	72.5	0.5	535.091	372.648	321	-51.648		1	-0.370808	-0.828397	-1.18209	0	7	CObs(ug/mL)	0
	24	73	1	887.007	497.454	344	-153.454		1	-1.10173	-0.386857	-1.13674	0	7	CObs(ug/mL)	0
	24	73.5	1.5	1199.7	615.55	624	8.4497		1	0.0606648	0.81724	0.403777	0	7	CObs(ug/mL)	0
	24	74	2	1477.54	727.297	552	-175.297		1	-1.25855	-0.60442	-0.716469	0	7	CObs(ug/mL)	0
	24	74.5	2.5	1312.86	688.192	780	91.8076		1	0.659135	0.741401	1.13227	0	7	CObs(ug/mL)	0
	24	75	3	1166.53	651.191	737	85.8093		1	0.61607	0.0735044	0.799106	0	7	CObs(ug/mL)	0
	24	76	4	920.99	583.049	717	133.951		1	0.961707	-0.170611	0.952487	0	7	CObs(ug/mL)	0
	24	77	5	727.131	522.037	503	-19.0372		1	-0.136678	-1.15739	-0.236553	0	7	CObs(ug/mL)	0
	24	78	6	574.077	467.41	448	-19.41		1	-0.139355	-0.748538	-0.217036	0	7	CObs(ug/mL)	0
	24	80	8	357.837	374.707	373	-1.70653		1	-0.0122521	-0.275837	-0.0766972	0	7	CObs(ug/mL)	0
	24	82	10	223.049	300.389	271	-29.3893		1	-0.211001	-0.215696	-0.240072	0	7	CObs(ug/mL)	0
	26	72	0	173.791	218.847	589	370.153		1	2.65752	0.709754	0.663182	0	7	CObs(ug/mL)	0
	26	72.5	0.5	668.864	608.841	480	-128.841		1	-0.925021	-0.87695	-1.15298	0	7	CObs(ug/mL)	0
	26	73	1	1108.76	962.216	886	-76.2159		1	-0.547194	1.13211	1.05178	0	7	CObs(ug/mL)	0
	26	73.5	1.5	1499.62	1282.41	1250	-32.4091		1	-0.232682	1.07307	1.12591	0	7	CObs(ug/mL)	0
	26	74	2	1846.93	1572.54	1810	237.463		1	1.70487	2.05254	2.1442	0	7	CObs(ug/mL)	0
	26	74.5	2.5	1641.07	1424.88	1380	-44.8786		1	-0.322207	-1.05035	-0.763501	0	7	CObs(ug/mL)	0
	26	75	3	1458.17	1291.09	1230	-61.0852		1	-0.438563	-1.21532	-0.940471	0	7	CObs(ug/mL)	0
	26	76	4	1151.24	1060.01	1030	-30.0076		1	-0.21544	-0.907629	-0.808824	0	7	CObs(ug/mL)	0
	26	77	5	908.913	870.288	807	-63.2881		1	-0.454378	-0.790525	-0.860166	0	7	CObs(ug/mL)	0
	26	78	6	717.596	714.524	700	-14.5245		1	-0.104279	-0.213499	-0.322153	0	7	CObs(ug/mL)	0
	26	80	8	447.296	481.643	452	-29.643		1	-0.212823	-0.220786	-0.336309	0	7	CObs(ug/mL)	0
	26	82	10	278.812	324.663	308	-16.6634		1	-0.119635	-0.0714494	-0.172588	0	7	CObs(ug/mL)	0
	26	84	12	173.791	218.847	187	-31.8475		1	-0.22865	-0.158563	-0.243798	0	7	CObs(ug/mL)	0
	28	72	0	139.032	87.3693	272	184.631		1	1.32556	0.279692	0.430993	0	7	CObs(ug/mL)	0
	28	72.5	0.5	535.091	384.029	438	53.9714		1	0.387489	-0.433442	-0.436932	0	7	CObs(ug/mL)	0
	28	73	1	887.007	645.641	632	-13.6411		1	-0.097937	-0.122725	-0.224265	0	7	CObs(ug/mL)	0
	28	73.5	1.5	1199.7	876.347	938	61.6525		1	0.442636	0.484419	0.409839	0	7	CObs(ug/mL)	0
	28	74	2	1477.54	1079.8	1040	-39.7987		1	-0.285736	-0.289837	-0.358701	0	7	CObs(ug/mL)	0
	28	74.5	2.5	1312.86	952.234	987	34.7662		1	0.249605	-0.185381	-0.259485	0	7	CObs(ug/mL)	0
	28	75	3	1166.53	839.739	807	-32.7392		1	-0.235052	-0.871763	-0.906194	0	7	CObs(ug/mL)	0
	28	76	4	920.99	653.049	615	-38.0494		1	-0.273177	-0.882967	-0.842517	0	7	CObs(ug/mL)	0
	28	77	5	727.131	507.864	469	-38.8643		1	-0.279027	-0.604115	-0.546364	0	7	CObs(ug/mL)	0
	28	78	6	574.077	394.957	378	-16.9565		1	-0.12174	-0.272947	-0.227905	0	7	CObs(ug/mL)	0
	28	80	8	357.837	238.865	228	-10.865		1	-0.0780057	-0.15687	-0.125039	0	7	CObs(ug/mL)	0
	28	82	10	223.049	144.463	129	-15.4627		1	-0.111015	-0.148103	-0.128403	0	7	CObs(ug/mL)	0
	28	84	12	139.032	87.3693	75.5	-11.8693		1	-0.0852163	-0.0999447	-0.088462	0	7	CObs(ug/mL)	0
	29	72	0	112.964	111.395	310	198.605		1	1.42589	0.499192	0.552952	0	7	CObs(ug/mL)	0
	29	72.5	0.5	434.762	338.235	395	56.7648		1	0.407545	-0.412583	-0.506272	0	7	CObs(ug/mL)	0
	29	73	1	720.693	542.655	643	100.345		1	0.720426	0.245602	0.150613	0	7	CObs(ug/mL)	0
	29	73.5	1.5	974.756	726.872	749	22.1284		1	0.158871	-0.255671	-0.271471	0	7	CObs(ug/mL)	0
	29	74	2	1200.5	892.88	922	29.1195		1	0.209065	-0.0925569	-0.0550393	0	7	CObs(ug/mL)	0
	29	74.5	2.5	1066.7	804.631	724	-80.6312		1	-0.578894	-1.15693	-1.01601	0	7	CObs(ug/mL)	0
	29	75	3	947.808	725.104	736	10.8957		1	0.0782263	-0.557188	-0.439954	0	7	CObs(ug/mL)	0
	29	76	4	748.304	588.854	423	-165.854		1	-1.19075	-1.60113	-1.65124	0	7	CObs(ug/mL)	0
	29	77	5	590.794	478.206	530	51.7943		1	0.371859	0.270536	0.127567	0	7	CObs(ug/mL)	0
	29	78	6	466.437	388.349	394	5.65128		1	0.0405735	-0.11046	-0.225154	0	7	CObs(ug/mL)	0
	29	80	8	290.743	256.116	208	-48.1157		1	-0.345448	-0.40825	-0.508158	0	7	CObs(ug/mL)	0
	29	82	10	181.228	168.908	137	-31.9081		1	-0.229085	-0.214277	-0.287104	0	7	CObs(ug/mL)	0
	29	84	12	112.964	111.395	80.1	-31.2948		1	-0.224682	-0.185966	-0.237898	0	7	CObs(ug/mL)	0
	30	72	0	147.722	306.909	584	277.091		1	1.98938	0.867976	0.663348	0	7	CObs(ug/mL)	0
	30	72.5	0.5	568.534	562.687	596	33.3127		1	0.239169	-0.466953	-0.926113	0	7	CObs(ug/mL)	0
	30	73	1	942.445	801.299	808	6.70075		1	0.0481082	0.215823	0.0413481	0	7	CObs(ug/mL)	0
	30	73.5	1.5	1274.68	1023.9	1100	76.103		1	0.546384	0.552891	0.657838	0	7	CObs(ug/mL)	0
	30	74	2	1569.89	1231.56	1080	-151.555		1	-1.0881	-0.999512	-0.675749	0	7	CObs(ug/mL)	0
	30	74.5	2.5	1394.91	1148.9	1240	91.0993		1	0.65405	-0.0487008	0.789826	0	7	CObs(ug/mL)	0
	30	75	3	1239.44	1071.79	1080	8.20656		1	0.0589192	-1.20427	-0.177533	0	7	CObs(ug/mL)	0
	30	76	4	978.551	932.756	906	-26.7565		1	-0.192099	-1.58487	-0.77006	0	7	CObs(ug/mL)	0
	30	77	5	772.576	811.756	864	52.2441		1	0.375088	-0.643055	-0.374993	0	7	CObs(ug/mL)	0
	30	78	6	609.957	706.452	747	40.548		1	0.291116	-0.484082	-0.533179	0	7	CObs(ug/mL)	0
	30	80	8	380.202	535.053	336	-199.053		1	-1.42911	-1.69225	-2.04463	0	7	CObs(ug/mL)	0
	30	82	10	236.99	405.239	310	-95.2391		1	-0.683772	-0.523256	-0.912333	0	7	CObs(ug/mL)	0
	30	84	12	147.722	306.92	231	-75.9204		1	-0.545073	-0.233975	-0.600744	0	7	CObs(ug/mL)	0
	32	72	0	95.5848	42.3461	204	161.654		1	1.1606	0.316878	0.568163	0	7	CObs(ug/mL)	0
	32	72.5	0.5	367.875	269.646	204	-65.6457		1	-0.471305	-0.760369	-0.699563	0	7	CObs(ug/mL)	0
	32	73	1	609.817	466.1	525	58.9002		1	0.422876	0.635205	0.542334	0	7	CObs(ug/mL)	0
	32	73.5	1.5	824.793	635.894	544	-91.8942		1	-0.659757	-0.392918	-0.502188	0	7	CObs(ug/mL)	0
	32	74	2	1015.81	782.647	881	98.3532		1	0.70613	0.892677	0.7589	0	7	CObs(ug/mL)	0
	32	74.5	2.5	902.591	676.438	652	-24.4383		1	-0.175455	-0.494514	-0.664786	0	7	CObs(ug/mL)	0
	32	75	3	801.991	584.643	596	11.3572		1	0.0815397	-0.337676	-0.403253	0	7	CObs(ug/mL)	0
	32	76	4	633.18	436.732	351	-85.7323		1	-0.615517	-0.950072	-0.862833	0	7	CObs(ug/mL)	0
	32	77	5	499.902	326.242	362	35.7578		1	0.256724	0.0996813	0.205495	0	7	CObs(ug/mL)	0
	32	78	6	394.678	243.705	182	-61.7052		1	-0.443014	-0.520224	-0.455319	0	7	CObs(ug/mL)	0
	32	80	8	246.013	135.992	165	29.0077		1	0.208261	0.209657	0.236559	0	7	CObs(ug/mL)	0
	32	82	10	153.346	75.8864	88.5	12.6136		1	0.0905598	0.0777095	0.0902235	0	7	CObs(ug/mL)	0
	32	84	12	95.5848	42.3461	32.6	-9.7461		1	-0.0699724	-0.0708285	-0.0716393	0	7	CObs(ug/mL)	0
	33	72	0	173.791	313.856	511	197.144		1	1.4154	0.576422	0.460439	0	7	CObs(ug/mL)	0
	33	72.5	0.5	668.864	661.312	766	104.688		1	0.751614	-0.151833	-0.348747	0	7	CObs(ug/mL)	0
	33	73	1	1108.76	982.083	1040	57.9165		1	0.415813	-0.0913377	-0.103045	0	7	CObs(ug/mL)	0
	33	73.5	1.5	1499.62	1278.22	1290	11.7786		1	0.0845651	-0.202694	-0.0719191	0	7	CObs(ug/mL)	0
	33	74	2	1846.93	1551.62	1360	-191.617		1	-1.37572	-1.1842	-0.8869	0	7	CObs(ug/mL)	0
	33	74.5	2.5	1641.07	1432.46	1510	77.5417		1	0.556713	0.0894455	0.757878	0	7	CObs(ug/mL)	0
	33	75	3	1458.17	1322.45	1470	147.549		1	1.05933	-0.149828	0.721806	0	7	CObs(ug/mL)	0
	33	76	4	1151.24	1127.13	1080	-47.1312		1	-0.33838	-1.8576	-1.13357	0	7	CObs(ug/mL)	0
	33	77	5	908.913	960.66	915	-45.6595		1	-0.327814	-1.24384	-1.10836	0	7	CObs(ug/mL)	0
	33	78	6	717.596	818.775	816	-2.77482		1	-0.0199219	-0.538784	-0.673983	0	7	CObs(ug/mL)	0
	33	80	8	447.296	594.777	501	-93.7774		1	-0.673277	-0.843357	-1.14503	0	7	CObs(ug/mL)	0
	33	82	10	278.812	432.06	340	-92.0604		1	-0.66095	-0.556739	-0.863151	0	7	CObs(ug/mL)	0
	33	84	12	173.791	313.859	241	-72.8589		1	-0.523092	-0.296767	-0.569869	0	7	CObs(ug/mL)	0
	34	72	0	147.722	261.195	392	130.805		1	0.939121	0.485992	0.394078	0	7	CObs(ug/mL)	0
	34	72.5	0.5	568.534	559.084	421	-138.084		1	-0.991376	-0.680635	-0.947528	0	7	CObs(ug/mL)	0
	34	73	1	942.445	833.786	783	-50.7864		1	-0.364622	0.712837	0.594001	0	7	CObs(ug/mL)	0
	34	73.5	1.5	1274.68	1087.11	1050	-37.1072		1	-0.266412	0.476886	0.494959	0	7	CObs(ug/mL)	0
	34	74	2	1569.89	1320.71	1060	-260.71		1	-1.87178	-0.880576	-0.761134	0	7	CObs(ug/mL)	0
	34	74.5	2.5	1394.91	1217.91	1400	182.089		1	1.30731	1.64353	2.03059	0	7	CObs(ug/mL)	0
	34	75	3	1239.44	1123.11	1310	186.887		1	1.34176	0.726678	1.43616	0	7	CObs(ug/mL)	0
	34	76	4	978.551	955.08	1160	204.92		1	1.47123	-0.0629848	1.00708	0	7	CObs(ug/mL)	0
	34	77	5	772.576	812.186	743	-69.186		1	-0.496723	-1.86737	-1.13375	0	7	CObs(ug/mL)	0
	34	78	6	609.957	690.671	596	-94.6714		1	-0.679696	-1.38669	-1.06882	0	7	CObs(ug/mL)	0
	34	80	8	380.202	499.463	466	-33.4631		1	-0.240249	-0.529204	-0.442441	0	7	CObs(ug/mL)	0
	34	82	10	236.99	361.19	308	-53.1897		1	-0.381877	-0.449189	-0.463749	0	7	CObs(ug/mL)	0
	34	84	12	147.722	261.196	240	-21.1965		1	-0.152181	-0.0991467	-0.165538	0	7	CObs(ug/mL)	0
	35	72	0	173.791	149.818	357	207.182		1	1.48747	0.313176	0.402098	0	7	CObs(ug/mL)	0
	35	72.5	0.5	668.864	443.411	697	253.589		1	1.82065	-0.137606	-0.0962763	0	7	CObs(ug/mL)	0
	35	73	1	1108.76	708.404	706	-2.40445		1	-0.0172628	-1.1537	-1.23236	0	7	CObs(ug/mL)	0
	35	73.5	1.5	1499.62	947.585	912	-35.5851		1	-0.255484	-0.36099	-0.385106	0	7	CObs(ug/mL)	0
	35	74	2	1846.93	1163.47	1230	66.5328		1	0.477674	0.430295	0.495061	0	7	CObs(ug/mL)	0
	35	74.5	2.5	1641.07	1050.13	997	-53.1339		1	-0.381476	-1.1409	-0.900654	0	7	CObs(ug/mL)	0
	35	75	3	1458.17	947.84	944	-3.84038		1	-0.0275721	-0.968389	-0.747935	0	7	CObs(ug/mL)	0
	35	76	4	1151.24	772.176	703	-69.1759		1	-0.49665	-1.40198	-1.37798	0	7	CObs(ug/mL)	0
	35	77	5	908.913	629.068	569	-60.0676		1	-0.431257	-0.865621	-1.01327	0	7	CObs(ug/mL)	0
	35	78	6	717.596	512.482	445	-67.4817		1	-0.484487	-0.605609	-0.768149	0	7	CObs(ug/mL)	0
	35	80	8	447.296	340.127	318	-22.1265		1	-0.158858	-0.137613	-0.278776	0	7	CObs(ug/mL)	0
	35	82	10	278.812	225.737	196	-29.7369		1	-0.213497	-0.155791	-0.262007	0	7	CObs(ug/mL)	0
	35	84	12	173.791	149.818	127	-22.8182		1	-0.163824	-0.0949902	-0.173841	0	7	CObs(ug/mL)	0
	36	72	0	130.343	267.832	637	369.168		1	2.65045	1.13012	0.786969	0	7	CObs(ug/mL)	0
	36	72.5	0.5	501.648	628.837	715	86.1625		1	0.618606	-0.0687909	-0.347808	0	7	CObs(ug/mL)	0
	36	73	1	831.569	959.607	1050	90.3926		1	0.648976	0.546157	0.592908	0	7	CObs(ug/mL)	0
	36	73.5	1.5	1124.72	1262.67	1350	87.3259		1	0.626959	0.349861	0.532353	0	7	CObs(ug/mL)	0
	36	74	2	1385.19	1540.36	1480	-60.3577		1	-0.43334	-0.63515	-0.319809	0	7	CObs(ug/mL)	0
	36	74.5	2.5	1230.81	1411.35	1390	-21.3466		1	-0.153258	-1.09211	-0.461049	0	7	CObs(ug/mL)	0
	36	75	3	1093.62	1293.14	1310	16.8593		1	0.121042	-1.20857	-0.565099	0	7	CObs(ug/mL)	0
	36	76	4	863.428	1085.6	1060	-25.6003		1	-0.183798	-1.6494	-1.35141	0	7	CObs(ug/mL)	0
	36	77	5	681.685	911.369	861	-50.3688		1	-0.361624	-1.28525	-1.46231	0	7	CObs(ug/mL)	0
	36	78	6	538.197	765.1	660	-105.1		1	-0.75457	-1.15943	-1.51186	0	7	CObs(ug/mL)	0
	36	80	8	335.472	539.221	495	-44.2209		1	-0.317485	-0.380007	-0.786749	0	7	CObs(ug/mL)	0
	36	82	10	209.109	380.028	273	-107.028		1	-0.768408	-0.658301	-0.99876	0	7	CObs(ug/mL)	0
	36	84	12	130.343	267.833	174	-93.8327		1	-0.673674	-0.468577	-0.727405	0	7	CObs(ug/mL)	0
	38	72	0	130.343	350.099	553.5	203.401		1	1.46033	0.94387	0.639248	0	7	CObs(ug/mL)	0
	38	72.5	0.5	501.648	631.855	972	340.145		1	2.44208	0.776083	0.50276	0	7	CObs(ug/mL)	0
	38	73	1	831.569	895.028	1234.5	339.472		1	2.43725	-0.31388	-0.22777	0	7	CObs(ug/mL)	0
	38	73.5	1.5	1124.72	1140.84	1359	218.158		1	1.56627	-1.14207	-0.879135	0	7	CObs(ug/mL)	0
	38	74	2	1385.19	1370.44	1377	6.5555		1	0.0470654	-2.03185	-1.50594	0	7	CObs(ug/mL)	0
	38	74.5	2.5	1230.81	1280.06	1102.5	-177.556		1	-1.27477	-3.15283	-2.22951	0	7	CObs(ug/mL)	0
	38	75	3	1093.62	1195.63	984	-211.628		1	-1.51939	-2.87817	-2.2256	0	7	CObs(ug/mL)	0
	38	76	4	863.428	1043.11	936	-107.112		1	-0.769015	-1.43175	-1.65196	0	7	CObs(ug/mL)	0
	38	77	5	681.685	910.051	886.5	-23.5511		1	-0.169086	-0.285505	-1.11275	0	7	CObs(ug/mL)	0
	38	78	6	538.197	793.964	672	-121.964		1	-0.875641	-0.649487	-1.66508	0	7	CObs(ug/mL)	0
	38	80	8	335.472	604.324	519	-85.3244		1	-0.612589	-0.0364456	-1.15852	0	7	CObs(ug/mL)	0
	38	82	10	209.109	459.981	309	-150.981		1	-1.08397	-0.358315	-1.31547	0	7	CObs(ug/mL)	0
	38	84	12	130.343	350.114	304.5	-45.6138		1	-0.327485	0.423041	-0.361575	0	7	CObs(ug/mL)	0
	39	72	0	112.964	130.398	364.5	234.102		1	1.68074	0.637268	0.564199	0	7	CObs(ug/mL)	0
	39	72.5	0.5	434.762	500.787	598.5	97.7128		1	0.701532	0.158014	0.142379	0	7	CObs(ug/mL)	0
	39	73	1	720.693	829.935	930	100.065		1	0.718422	0.329085	0.325306	0	7	CObs(ug/mL)	0
	39	73.5	1.5	974.756	1122.43	1140	17.5674		1	0.126125	-0.18924	-0.187002	0	7	CObs(ug/mL)	0
	39	74	2	1200.5	1382.36	1353	-29.3621		1	-0.210806	-0.311654	-0.307078	0	7	CObs(ug/mL)	0
	39	74.5	2.5	1066.7	1228.44	1195.5	-32.9411		1	-0.236501	-0.800462	-0.811698	0	7	CObs(ug/mL)	0
	39	75	3	947.808	1091.66	1086	-5.65862		1	-0.0406262	-0.82067	-0.836839	0	7	CObs(ug/mL)	0
	39	76	4	748.304	862.089	886.5	24.4114		1	0.175263	-0.778033	-0.793612	0	7	CObs(ug/mL)	0
	39	77	5	590.794	680.796	685.5	4.70411		1	0.0337732	-0.726758	-0.73531	0	7	CObs(ug/mL)	0
	39	78	6	466.437	537.628	330	-207.628		1	-1.49067	-1.76839	-1.77139	0	7	CObs(ug/mL)	0
	39	80	8	290.743	335.283	306	-29.2834		1	-0.210241	-0.154852	-0.155213	0	7	CObs(ug/mL)	0
	39	82	10	181.228	209.094	190.5	-18.5943		1	-0.133498	-0.0640032	-0.0640314	0	7	CObs(ug/mL)	0
	39	84	12	112.964	130.398	219	88.6016		1	0.636118	0.665126	0.665017	0	7	CObs(ug/mL)	0
	40	72	0	173.791	211.641	418.5	206.859		1	1.48515	0.418303	0.411652	0	7	CObs(ug/mL)	0
	40	72.5	0.5	668.864	541.03	445.5	-95.5301		1	-0.685861	-0.767491	-1.0552	0	7	CObs(ug/mL)	0
	40	73	1	1108.76	841.122	835.5	-5.62231		1	-0.0403656	0.807536	0.650393	0	7	CObs(ug/mL)	0
	40	73.5	1.5	1499.62	1114.52	1129.5	14.9766		1	0.107525	0.564425	0.56111	0	7	CObs(ug/mL)	0
	40	74	2	1846.93	1363.61	1296	-67.6074		1	-0.485389	-0.123463	-0.05023	0	7	CObs(ug/mL)	0
	40	74.5	2.5	1641.07	1242.32	1419	176.676		1	1.26845	0.923674	1.21567	0	7	CObs(ug/mL)	0
	40	75	3	1458.17	1131.83	1188	56.1719		1	0.403288	-0.463926	-0.0370335	0	7	CObs(ug/mL)	0
	40	76	4	1151.24	939.445	748.5	-190.945		1	-1.3709	-2.01493	-1.78622	0	7	CObs(ug/mL)	0
	40	77	5	908.913	779.763	772.5	-7.26315		1	-0.052146	-0.151397	-0.193287	0	7	CObs(ug/mL)	0
	40	78	6	717.596	647.223	613.5	-33.7228		1	-0.242114	-0.237419	-0.308126	0	7	CObs(ug/mL)	0
	40	80	8	447.296	445.899	465	19.1015		1	0.137139	0.198105	0.101631	0	7	CObs(ug/mL)	0
	40	82	10	278.812	307.198	294	-13.1979		1	-0.0947549	-0.0249899	-0.128079	0	7	CObs(ug/mL)	0
	40	84	12	173.791	211.641	195	-16.6414		1	-0.119477	-0.0306824	-0.12812	0	7	CObs(ug/mL)	0
	41	72	0	121.653	353.931	463.5	109.569		1	0.786657	0.811196	0.554	0	7	CObs(ug/mL)	0
	41	72.5	0.5	468.205	603.937	571.5	-32.4372		1	-0.232884	-0.164783	-0.500344	0	7	CObs(ug/mL)	0
	41	73	1	776.131	838.518	625.5	-213.018		1	-1.52937	-0.487012	-0.562853	0	7	CObs(ug/mL)	0
	41	73.5	1.5	1049.74	1058.62	856.5	-202.124		1	-1.45116	0.203003	0.339822	0	7	CObs(ug/mL)	0
	41	74	2	1292.85	1265.15	1059	-206.15		1	-1.48006	0.223679	0.504781	0	7	CObs(ug/mL)	0
	41	74.5	2.5	1148.75	1187.09	1317	129.913		1	0.932714	1.44527	2.11288	0	7	CObs(ug/mL)	0
	41	75	3	1020.72	1113.84	1389	275.159		1	1.97551	1.27156	2.42223	0	7	CObs(ug/mL)	0
	41	76	4	805.866	980.628	1156.5	175.872		1	1.26268	-0.591625	1.1666	0	7	CObs(ug/mL)	0
	41	77	5	636.239	863.347	955.5	92.153		1	0.661615	-1.17512	0.255015	0	7	CObs(ug/mL)	0
	41	78	6	502.317	760.093	817.5	57.4074		1	0.412158	-1.02883	-0.142858	0	7	CObs(ug/mL)	0
	41	80	8	313.108	589.154	516	-73.154		1	-0.525211	-1.36988	-1.058	0	7	CObs(ug/mL)	0
	41	82	10	195.168	456.658	372	-84.658		1	-0.607805	-0.90167	-0.907263	0	7	CObs(ug/mL)	0
	41	84	12	121.653	353.959	240	-113.959		1	-0.818174	-0.770124	-0.90788	0	7	CObs(ug/mL)	0
	42	72	0	167.998	206.906	546	339.094		1	2.43453	0.667109	0.670224	0	7	CObs(ug/mL)	0
	42	72.5	0.5	646.569	503.632	516	12.3681		1	0.0887969	-0.725416	-1.10227	0	7	CObs(ug/mL)	0
	42	73	1	1071.8	774.845	873	98.155		1	0.704707	0.80022	0.609073	0	7	CObs(ug/mL)	0
	42	73.5	1.5	1449.64	1022.74	877.5	-145.239		1	-1.04275	-0.655173	-0.610281	0	7	CObs(ug/mL)	0
	42	74	2	1785.36	1249.32	1314	64.6818		1	0.464384	0.944683	1.1275	0	7	CObs(ug/mL)	0
	42	74.5	2.5	1586.37	1141.9	1149	7.09987		1	0.0509737	-0.638499	-0.123525	0	7	CObs(ug/mL)	0
	42	75	3	1409.56	1043.72	1072.5	28.782		1	0.206641	-0.938467	-0.339172	0	7	CObs(ug/mL)	0
	42	76	4	1112.86	871.953	894	22.0466		1	0.158284	-1.25519	-0.842198	0	7	CObs(ug/mL)	0
	42	77	5	878.616	728.456	733.5	5.04396		1	0.0362132	-1.03584	-0.992262	0	7	CObs(ug/mL)	0
	42	78	6	693.676	608.574	430.5	-178.074		1	-1.27849	-1.78501	-1.93689	0	7	CObs(ug/mL)	0
	42	80	8	432.387	424.75	381	-43.7502		1	-0.314106	-0.392017	-0.612989	0	7	CObs(ug/mL)	0
	42	82	10	269.518	296.452	220.5	-75.9516		1	-0.545297	-0.484205	-0.672522	0	7	CObs(ug/mL)	0
	42	84	12	167.998	206.906	162	-44.9064		1	-0.322407	-0.198026	-0.346991	0	7	CObs(ug/mL)	0
	43	72	0	173.791	223.137	364.5	141.363		1	1.01492	0.325996	0.314131	0	7	CObs(ug/mL)	0
	43	72.5	0.5	668.864	446.59	418.5	-28.0903		1	-0.201675	-0.768778	-1.13177	0	7	CObs(ug/mL)	0
	43	73	1	1108.76	653.659	745.5	91.8408		1	0.659374	0.542695	0.190603	0	7	CObs(ug/mL)	0
	43	73.5	1.5	1499.62	845.545	948	102.455		1	0.735581	0.164838	0.0729791	0	7	CObs(ug/mL)	0
	43	74	2	1846.93	1023.36	750	-273.36		1	-1.9626	-1.99028	-1.89438	0	7	CObs(ug/mL)	0
	43	74.5	2.5	1641.07	948.322	1002	53.6777		1	0.38538	0.209163	0.658376	0	7	CObs(ug/mL)	0
	43	75	3	1458.17	878.787	1060.5	181.713		1	1.30462	0.459547	1.14573	0	7	CObs(ug/mL)	0
	43	76	4	1151.24	754.637	751.5	-3.13737		1	-0.0225248	-1.28616	-0.550142	0	7	CObs(ug/mL)	0
	43	77	5	908.913	648.027	451.5	-196.527		1	-1.41097	-1.97821	-1.80317	0	7	CObs(ug/mL)	0
	43	78	6	717.596	556.478	682.5	126.022		1	0.904777	0.673286	0.603098	0	7	CObs(ug/mL)	0
	43	80	8	447.296	410.353	352.5	-57.8533		1	-0.415359	-0.580096	-0.75827	0	7	CObs(ug/mL)	0
	43	82	10	278.812	302.599	213	-89.5991		1	-0.643279	-0.582149	-0.785679	0	7	CObs(ug/mL)	0
	43	84	12	173.791	223.14	187.5	-35.64		1	-0.255878	-0.0883267	-0.279702	0	7	CObs(ug/mL)	0
	44	72	0	130.343	134.452	535.5	401.048		1	2.87934	0.90372	0.827658	0	7	CObs(ug/mL)	0
	44	72.5	0.5	501.648	598.435	226.5	-371.935		1	-2.67032	-1.32676	-1.03843	0	7	CObs(ug/mL)	0
	44	73	1	831.569	1007.32	1314	306.683		1	2.20184	3.87924	3.96061	0	7	CObs(ug/mL)	0
	44	73.5	1.5	1124.72	1367.64	1375.5	7.85782		1	0.0564154	-0.018901	-0.0431257	0	7	CObs(ug/mL)	0
	44	74	2	1385.19	1685.18	1665	-20.1763		1	-0.144856	-0.113304	-0.166205	0	7	CObs(ug/mL)	0
	44	74.5	2.5	1230.81	1485.05	1422	-63.0511		1	-0.452677	-0.895422	-1.02152	0	7	CObs(ug/mL)	0
	44	75	3	1093.62	1308.69	1435.5	126.808		1	0.910421	0.0968912	-0.013641	0	7	CObs(ug/mL)	0
	44	76	4	863.428	1016.32	886.5	-129.818		1	-0.932031	-1.83559	-1.84281	0	7	CObs(ug/mL)	0
	44	77	5	681.685	789.263	640.5	-148.763		1	-1.06805	-1.27293	-1.19622	0	7	CObs(ug/mL)	0
	44	78	6	538.197	612.934	799.5	186.566		1	1.33946	1.17141	1.23363	0	7	CObs(ug/mL)	0
	44	80	8	335.472	369.656	294	-75.6562		1	-0.543176	-0.796455	-0.751082	0	7	CObs(ug/mL)	0
	44	82	10	209.109	222.937	154.5	-68.437		1	-0.491345	-0.57193	-0.549295	0	7	CObs(ug/mL)	0
	44	84	12	130.343	134.452	106.35	-28.1017		1	-0.201757	-0.218565	-0.209439	0	7	CObs(ug/mL)	0
	45	72	0	139.032	401.276	505.5	104.224		1	0.748278	0.770851	0.514064	0	7	CObs(ug/mL)	0
	45	72.5	0.5	535.091	567.609	900	332.391		1	2.38641	0.517264	0.529915	0	7	CObs(ug/mL)	0
	45	73	1	887.007	726.349	831	104.651		1	0.751343	-1.47397	-1.37843	0	7	CObs(ug/mL)	0
	45	73.5	1.5	1199.7	877.843	1083	205.157		1	1.47293	-0.360667	-0.193115	0	7	CObs(ug/mL)	0
	45	74	2	1477.54	1022.42	964.5	-57.9213		1	-0.415848	-1.9725	-1.49118	0	7	CObs(ug/mL)	0
	45	74.5	2.5	1312.86	975.749	963	-12.749		1	-0.0915315	-1.78426	-0.678006	0	7	CObs(ug/mL)	0
	45	75	3	1166.53	931.207	975	43.7928		1	0.314412	-1.47136	-0.265405	0	7	CObs(ug/mL)	0
	45	76	4	920.99	848.131	736.5	-111.631		1	-0.801455	-2.19118	-1.46955	0	7	CObs(ug/mL)	0
	45	77	5	727.131	772.466	409.5	-362.966		1	-2.60592	-2.59638	-3.08352	0	7	CObs(ug/mL)	0
	45	78	6	574.077	703.551	714	10.449		1	0.0750192	0.793414	-0.216032	0	7	CObs(ug/mL)	0
	45	80	8	357.837	583.618	408	-175.618		1	-1.26085	-0.248227	-1.43387	0	7	CObs(ug/mL)	0
	46	72	0	182.48	406.59	646.5	239.91		1	1.72244	0.757418	0.566423	0	7	CObs(ug/mL)	0
	46	73	1	1164.2	861.484	1308	446.516		1	3.20578	0.058228	-0.0755566	0	7	CObs(ug/mL)	0
	46	73.5	1.5	1574.61	1070.26	1227	156.742		1	1.12533	-1.84502	-1.66279	0	7	CObs(ug/mL)	0
	46	74	2	1939.27	1267.5	1500	232.503		1	1.66926	-0.856963	-0.37062	0	7	CObs(ug/mL)	0
	46	74.5	2.5	1723.13	1197.46	898.5	-298.962		1	-2.14641	-4.40537	-3.49568	0	7	CObs(ug/mL)	0
	46	75	3	1531.07	1131.3	945	-186.297		1	-1.33753	-2.53113	-2.09314	0	7	CObs(ug/mL)	0
	46	76	4	1208.8	1009.73	669	-340.733		1	-2.4463	-2.22251	-3.03517	0	7	CObs(ug/mL)	0
	46	77	5	954.359	901.232	1021.5	120.268		1	0.863466	1.64233	0.325498	0	7	CObs(ug/mL)	0
	46	78	6	753.476	804.39	727.5	-76.8901		1	-0.552034	0.0579055	-1.13272	0	7	CObs(ug/mL)	0
	46	80	8	469.661	640.806	618	-22.8061		1	-0.163737	0.665519	-0.635032	0	7	CObs(ug/mL)	0
	46	82	10	292.752	510.489	409.5	-100.989		1	-0.725055	0.198504	-0.991179	0	7	CObs(ug/mL)	0
	46	84	12	182.48	406.674	337.5	-69.1741		1	-0.496638	0.477345	-0.559934	0	7	CObs(ug/mL)	0
	47	72	0	121.653	294.36	940	645.64		1	4.63539	1.94192	1.17658	0	7	CObs(ug/mL)	0
	47	72.5	0.5	468.205	685.766	795	109.234		1	0.784249	-0.154791	-0.574962	0	7	CObs(ug/mL)	0
	47	73	1	776.131	1044.58	1260	215.42		1	1.54661	1.42585	1.54195	0	7	CObs(ug/mL)	0
	47	73.5	1.5	1049.74	1373.52	1340	-33.517		1	-0.240636	-0.36958	-0.0393008	0	7	CObs(ug/mL)	0
	47	74	2	1292.85	1675.06	1660	-15.0638		1	-0.108151	0.025018	0.567771	0	7	CObs(ug/mL)	0
	47	74.5	2.5	1148.75	1535.58	1660	124.415		1	0.893243	-0.73058	0.305149	0	7	CObs(ug/mL)	0
	47	75	3	1020.72	1407.72	1570	162.28		1	1.16509	-1.46173	-0.288603	0	7	CObs(ug/mL)	0
	47	76	4	805.866	1183.04	831	-352.045		1	-2.52751	-4.93288	-4.50236	0	7	CObs(ug/mL)	0
	47	77	5	636.239	994.228	822	-172.228		1	-1.23652	-2.04998	-2.60334	0	7	CObs(ug/mL)	0
	47	78	6	502.317	835.547	660	-175.547		1	-1.26034	-1.30306	-2.01794	0	7	CObs(ug/mL)	0
	47	80	8	313.108	590.12	517	-73.1203		1	-0.524969	-0.208936	-0.88654	0	7	CObs(ug/mL)	0
	47	82	10	195.168	416.783	319	-97.7833		1	-0.702038	-0.30362	-0.831909	0	7	CObs(ug/mL)	0
	47	84	12	121.653	294.361	264	-30.3608		1	-0.217977	0.173999	-0.235538	0	7	CObs(ug/mL)	0
	49	72	0	182.48	481.222	741	259.778		1	1.86508	0.91167	0.621349	0	7	CObs(ug/mL)	0
	49	72.5	0.5	702.307	839.936	1120	280.064		1	2.01073	0.306211	0.00219694	0	7	CObs(ug/mL)	0
	49	73	1	1164.2	1175.89	1330	154.109		1	1.10643	-0.627668	-0.547718	0	7	CObs(ug/mL)	0
	49	73.5	1.5	1574.61	1490.53	1410	-80.5325		1	-0.578186	-1.40216	-1.04817	0	7	CObs(ug/mL)	0
	49	74	2	1939.27	1785.21	1860	74.7879		1	0.536942	0.0414971	0.668585	0	7	CObs(ug/mL)	0
	49	74.5	2.5	1723.13	1671.95	1680	8.04728		1	0.0577756	-1.5562	-0.318941	0	7	CObs(ug/mL)	0
	49	75	3	1531.07	1565.88	1520	-45.8789		1	-0.329389	-2.20141	-0.879294	0	7	CObs(ug/mL)	0
	49	76	4	1208.8	1373.49	1290	-83.4932		1	-0.599442	-2.20806	-1.45018	0	7	CObs(ug/mL)	0
	49	77	5	954.359	1204.74	1230	25.2557		1	0.181324	-0.730238	-0.792057	0	7	CObs(ug/mL)	0
	49	78	6	753.476	1056.73	925	-131.728		1	-0.945745	-1.30052	-1.80567	0	7	CObs(ug/mL)	0
	49	80	8	469.661	813.018	521	-292.018		1	-2.09655	-1.65121	-2.49677	0	7	CObs(ug/mL)	0
	49	82	10	292.752	625.513	445	-180.513		1	-1.296	-0.412417	-1.18584	0	7	CObs(ug/mL)	0
	49	84	12	182.48	481.253	637	155.747		1	1.11819	2.00795	1.23918	0	7	CObs(ug/mL)	0
	51	72	0	156.412	331.384	992	660.616		1	4.74291	1.5766	1.07445	0	7	CObs(ug/mL)	0
	51	72.5	0.5	601.978	735.716	699	-36.7163		1	-0.263606	-0.751291	-1.22505	0	7	CObs(ug/mL)	0
	51	73	1	997.883	1107.62	1110	2.38388		1	0.0171151	1.48134	1.55295	0	7	CObs(ug/mL)	0
	51	73.5	1.5	1349.66	1449.69	1570	120.315		1	0.863803	1.64437	1.92826	0	7	CObs(ug/mL)	0
	51	74	2	1662.23	1764.32	1790	25.6837		1	0.184397	0.330759	0.781364	0	7	CObs(ug/mL)	0
	51	74.5	2.5	1476.97	1622.8	1850	227.202		1	1.63121	-0.0662678	1.01348	0	7	CObs(ug/mL)	0
	51	75	3	1312.35	1492.63	1360	-132.63		1	-0.952223	-3.27707	-2.10233	0	7	CObs(ug/mL)	0
	51	76	4	1036.11	1262.78	989	-273.781		1	-1.96562	-3.69562	-3.32961	0	7	CObs(ug/mL)	0
	51	77	5	818.022	1068.33	1180	111.674		1	0.801766	-0.104688	-0.461781	0	7	CObs(ug/mL)	0
	51	78	6	645.837	903.815	788	-115.815		1	-0.831498	-1.41896	-1.9239	0	7	CObs(ug/mL)	0
	51	80	8	402.567	646.891	243	-403.891		1	-2.89975	-2.70802	-3.27282	0	7	CObs(ug/mL)	0
	51	82	10	250.93	463.002	381	-82.0019		1	-0.588735	-0.0239461	-0.434801	0	7	CObs(ug/mL)	0
	51	84	12	156.412	331.386	478	146.614		1	1.05262	1.52027	1.14189	0	7	CObs(ug/mL)	0
	52	72	0	139.032	395.285	764	368.715		1	2.6472	1.3146	0.731606	0	7	CObs(ug/mL)	0
	52	72.5	0.5	535.091	977.546	1010	32.4544		1	0.233007	0.483193	0.228108	0	7	CObs(ug/mL)	0
	52	73	1	887.007	1509.18	1510	0.82005		1	0.00588757	0.781992	0.827115	0	7	CObs(ug/mL)	0
	52	73.5	1.5	1199.7	1994.59	2000	5.41002		1	0.0388414	0.627954	0.799505	0	7	CObs(ug/mL)	0
	52	74	2	1477.54	2437.79	2770	332.205		1	2.38508	2.03522	2.2548	0	7	CObs(ug/mL)	0
	52	74.5	2.5	1312.86	2225.83	1940	-285.834		1	-2.05216	-3.15654	-2.7425	0	7	CObs(ug/mL)	0
	52	75	3	1166.53	2032.3	1970	-62.3034		1	-0.447309	-1.23692	-0.959866	0	7	CObs(ug/mL)	0
	52	76	4	920.99	1694.26	1740	45.7404		1	0.328394	-0.478629	-0.470765	0	7	CObs(ug/mL)	0
	52	77	5	727.131	1412.44	1320	-92.4444		1	-0.663707	-1.13635	-1.37443	0	7	CObs(ug/mL)	0
	52	78	6	574.077	1177.51	1090	-87.505		1	-0.628245	-0.66584	-0.994775	0	7	CObs(ug/mL)	0
	52	80	8	357.837	818.362	778	-40.3622		1	-0.289782	-0.0992361	-0.446759	0	7	CObs(ug/mL)	0
	52	82	10	223.049	568.759	531	-37.7591		1	-0.271093	-0.0149726	-0.322992	0	7	CObs(ug/mL)	0
	52	84	12	139.032	395.286	381	-14.2858		1	-0.102565	0.161048	-0.110358	0	7	CObs(ug/mL)	0
	53	72	0	182.48	457.017	717	259.983		1	1.86656	0.872495	0.614251	0	7	CObs(ug/mL)	0
	53	72.5	0.5	702.307	767.674	301	-466.674		1	-3.3505	-1.42309	-2.30638	0	7	CObs(ug/mL)	0
	53	73	1	1164.2	1059.55	256	-803.546		1	-5.76908	0.269825	-0.136868	0	7	CObs(ug/mL)	0
	53	73.5	1.5	1574.61	1333.77	777	-556.767		1	-3.99732	2.65785	2.72084	0	7	CObs(ug/mL)	0
	53	74	2	1939.27	1591.41	1370	-221.406		1	-1.58959	3.67891	3.79236	0	7	CObs(ug/mL)	0
	53	74.5	2.5	1723.13	1495.17	2220	724.83		1	5.20394	6.87503	7.63936	0	7	CObs(ug/mL)	0
	53	75	3	1531.07	1404.75	1790	385.246		1	2.76589	1.70931	3.65832	0	7	CObs(ug/mL)	0
	53	76	4	1208.8	1239.99	1490	250.006		1	1.79493	-1.09614	2.25125	0	7	CObs(ug/mL)	0
	53	77	5	954.359	1094.56	1260	165.442		1	1.18779	-1.72695	1.33955	0	7	CObs(ug/mL)	0
	53	78	6	753.476	966.18	1070	103.82		1	0.745375	-1.62528	0.656246	0	7	CObs(ug/mL)	0
	53	80	8	469.661	752.83	762	9.16999		1	0.0658362	-1.52984	-0.133508	0	7	CObs(ug/mL)	0
	53	82	10	292.752	586.591	568	-18.5913		1	-0.133477	-0.985313	-0.29244	0	7	CObs(ug/mL)	0
	53	84	12	182.48	457.061	384	-73.0611		1	-0.524544	-0.848981	-0.58335	0	7	CObs(ug/mL)	0
	54	72	0	173.791	416.794	841	424.206		1	3.0456	1.14052	0.734018	0	7	CObs(ug/mL)	0
	54	72.5	0.5	668.864	920.66	701	-219.66		1	-1.57706	-0.658448	-0.897052	0	7	CObs(ug/mL)	0
	54	73	1	1108.76	1384.28	1110	-274.275		1	-1.96917	1.17466	1.30486	0	7	CObs(ug/mL)	0
	54	73.5	1.5	1499.62	1810.85	1710	-100.854		1	-0.724086	2.00292	2.22608	0	7	CObs(ug/mL)	0
	54	74	2	1846.93	2203.36	1810	-393.356		1	-2.82411	-0.296234	0.041272	0	7	CObs(ug/mL)	0
	54	74.5	2.5	1641.07	2027.34	2760	732.66		1	5.26015	5.31187	6.26498	0	7	CObs(ug/mL)	0
	54	75	3	1458.17	1865.39	1970	104.615		1	0.751085	-1.21204	0.359273	0	7	CObs(ug/mL)	0
	54	76	4	1151.24	1579.26	1650	70.7444		1	0.507911	-2.16873	-0.516734	0	7	CObs(ug/mL)	0
	54	77	5	908.913	1337.02	1260	-77.0151		1	-0.552932	-2.50968	-1.63648	0	7	CObs(ug/mL)	0
	54	78	6	717.596	1131.93	1090	-41.9317		1	-0.30105	-1.45949	-1.11895	0	7	CObs(ug/mL)	0
	54	80	8	447.296	811.312	716	-95.3122		1	-0.684297	-1.25883	-1.23732	0	7	CObs(ug/mL)	0
	54	82	10	278.812	581.508	478	-103.508		1	-0.74314	-0.90001	-0.993517	0	7	CObs(ug/mL)	0
	54	84	12	173.791	416.796	316	-100.796		1	-0.723668	-0.656325	-0.785543	0	7	CObs(ug/mL)	0
	56	72	0	121.653	185.657	446	260.343		1	1.86914	0.769669	0.650091	0	7	CObs(ug/mL)	0
	56	72.5	0.5	468.205	464.117	511	46.8826		1	0.336595	-0.32277	-0.530423	0	7	CObs(ug/mL)	0
	56	73	1	776.131	718.185	688	-30.1847		1	-0.216712	0.0206798	-0.0287075	0	7	CObs(ug/mL)	0
	56	73.5	1.5	1049.74	949.995	835	-114.995		1	-0.825612	-0.102951	-0.019372	0	7	CObs(ug/mL)	0
	56	74	2	1292.85	1161.5	1220	58.501		1	0.42001	1.01019	1.17141	0	7	CObs(ug/mL)	0
	56	74.5	2.5	1148.75	1059.75	1080	20.2499		1	0.145385	-0.275986	0.103388	0	7	CObs(ug/mL)	0
	56	75	3	1020.72	966.914	1060	93.0855		1	0.66831	-0.247525	0.233961	0	7	CObs(ug/mL)	0
	56	76	4	805.866	804.928	786	-18.9285		1	-0.135897	-1.32061	-0.952633	0	7	CObs(ug/mL)	0
	56	77	5	636.239	670.08	606	-64.0798		1	-0.460063	-1.19167	-1.15657	0	7	CObs(ug/mL)	0
	56	78	6	502.317	557.822	535	-22.8221		1	-0.163852	-0.540033	-0.636794	0	7	CObs(ug/mL)	0
	56	80	8	313.108	386.575	313	-73.5754		1	-0.528236	-0.66836	-0.812129	0	7	CObs(ug/mL)	0
	56	82	10	195.168	267.9	218	-49.9		1	-0.358258	-0.34214	-0.467769	0	7	CObs(ug/mL)	0
	56	84	12	121.653	185.657	136	-49.6569		1	-0.356513	-0.280544	-0.382889	0	7	CObs(ug/mL)	0
	57	72	0	147.722	181.54	508	326.46		1	2.34383	0.716774	0.665888	0	7	CObs(ug/mL)	0
	57	72.5	0.5	568.534	539.747	575	35.2526		1	0.253097	-0.427332	-0.571159	0	7	CObs(ug/mL)	0
	57	73	1	942.445	862.971	915	52.0292		1	0.373545	0.555211	0.532969	0	7	CObs(ug/mL)	0
	57	73.5	1.5	1274.68	1154.63	1180	25.3734		1	0.182169	0.301073	0.360739	0	7	CObs(ug/mL)	0
	57	74	2	1569.89	1417.8	1440	22.2021		1	0.159401	0.178828	0.296024	0	7	CObs(ug/mL)	0
	57	74.5	2.5	1394.91	1279.33	1230	-49.3288		1	-0.354158	-1.05981	-0.792797	0	7	CObs(ug/mL)	0
	57	75	3	1239.44	1154.38	1160	5.61664		1	0.0403248	-0.930455	-0.685822	0	7	CObs(ug/mL)	0
	57	76	4	978.551	939.909	926	-13.909		1	-0.0998597	-1.20519	-1.13787	0	7	CObs(ug/mL)	0
	57	77	5	772.576	765.282	730	-35.282		1	-0.253308	-0.984123	-1.08881	0	7	CObs(ug/mL)	0
	57	78	6	609.957	623.099	559	-64.0993		1	-0.460203	-0.832011	-0.973006	0	7	CObs(ug/mL)	0
	57	80	8	380.202	413.075	347	-66.0748		1	-0.474386	-0.593205	-0.727738	0	7	CObs(ug/mL)	0
	57	82	10	236.99	273.842	209	-64.8421		1	-0.465535	-0.451742	-0.550113	0	7	CObs(ug/mL)	0
	57	84	12	147.722	181.54	150	-31.5397		1	-0.22644	-0.169374	-0.240326	0	7	CObs(ug/mL)	0
	58	72	0	173.791	173.25	371	197.75		1	1.41975	0.337107	0.367465	0	7	CObs(ug/mL)	0
	58	72.5	0.5	668.864	541.554	514	-27.5541		1	-0.197825	-0.562274	-0.70114	0	7	CObs(ug/mL)	0
	58	73	1	1108.76	872.866	876	3.13391		1	0.0225	0.468522	0.386703	0	7	CObs(ug/mL)	0
	58	73.5	1.5	1499.62	1170.9	1230	59.0985		1	0.4243	0.593681	0.590312	0	7	CObs(ug/mL)	0
	58	74	2	1846.93	1439	1460	20.9976		1	0.150753	0.0872051	0.12045	0	7	CObs(ug/mL)	0
	58	74.5	2.5	1641.07	1294.47	1220	-74.4703		1	-0.534662	-0.903283	-0.787862	0	7	CObs(ug/mL)	0
	58	75	3	1458.17	1164.45	1200	35.5451		1	0.255197	-0.231162	-0.121638	0	7	CObs(ug/mL)	0
	58	76	4	1151.24	942.288	958	15.7116		1	0.112802	-0.53546	-0.481458	0	7	CObs(ug/mL)	0
	58	77	5	908.913	762.509	743	-19.509		1	-0.140065	-0.60612	-0.630004	0	7	CObs(ug/mL)	0
	58	78	6	717.596	617.03	598	-19.0298		1	-0.136625	-0.402334	-0.449556	0	7	CObs(ug/mL)	0
	58	80	8	447.296	404.044	152	-252.044		1	-1.80956	-1.73519	-1.77245	0	7	CObs(ug/mL)	0
	58	82	10	278.812	264.576	309	44.4238		1	0.318942	0.535413	0.519539	0	7	CObs(ug/mL)	0
	58	84	12	173.791	173.25	324	150.75		1	1.08231	1.17484	1.14504	0	7	CObs(ug/mL)	0
	59	72	0	139.032	41.8262	849	807.174		1	5.79513	1.49339	3.02084	0	7	CObs(ug/mL)	0
	59	72.5	0.5	535.091	489.659	907	417.341		1	2.99631	0.0953249	1.30595	0	7	CObs(ug/mL)	0
	59	73	1	887.007	864.834	1260	395.166		1	2.8371	0.61969	-0.0642186	0	7	CObs(ug/mL)	0
	59	73.5	1.5	1199.7	1179.14	1240	60.8612		1	0.436955	-1.19476	-2.74218	0	7	CObs(ug/mL)	0
	59	74	2	1477.54	1442.45	1350	-92.4494		1	-0.663743	-1.38001	-3.60609	0	7	CObs(ug/mL)	0
	59	74.5	2.5	1312.86	1208.42	1030	-178.42		1	-1.28097	-3.7261	-4.3763	0	7	CObs(ug/mL)	0
	59	75	3	1166.53	1012.36	679	-333.361		1	-2.39337	-5.15496	-2.67924	0	7	CObs(ug/mL)	0
	59	76	4	920.99	710.51	722	11.4899		1	0.0824923	-2.70984	0.794924	0	7	CObs(ug/mL)	0
	59	77	5	727.131	498.661	464	-34.6606		1	-0.248847	-2.29183	0.193574	0	7	CObs(ug/mL)	0
	59	78	6	574.077	349.977	424	74.0227		1	0.531448	-0.91218	0.78592	0	7	CObs(ug/mL)	0
	59	80	8	357.837	172.389	232	59.611		1	0.427979	-0.634646	0.500679	0	7	CObs(ug/mL)	0
	59	82	10	223.049	84.914	126	41.086		1	0.294978	-0.421356	0.311826	0	7	CObs(ug/mL)	0
	59	84	12	139.032	41.8262	74.7	32.8738		1	0.236018	-0.233715	0.238537	0	7	CObs(ug/mL)	0
	60	72	0	121.653	337.887	779	441.113		1	3.16698	1.55987	0.942904	0	7	CObs(ug/mL)	0
	60	72.5	0.5	468.205	686.384	706	19.6163		1	0.140836	-0.19881	-0.651287	0	7	CObs(ug/mL)	0
	60	73	1	776.131	1008.97	1160	151.027		1	1.0843	1.25699	1.32043	0	7	CObs(ug/mL)	0
	60	73.5	1.5	1049.74	1307.58	1450	142.419		1	1.0225	0.521211	0.773009	0	7	CObs(ug/mL)	0
	60	74	2	1292.85	1583.99	1630	46.0102		1	0.330332	-0.382531	0.0455728	0	7	CObs(ug/mL)	0
	60	74.5	2.5	1148.75	1466.24	1400	-66.2351		1	-0.475536	-1.89956	-1.04146	0	7	CObs(ug/mL)	0
	60	75	3	1020.72	1357.23	1320	-37.2343		1	-0.267325	-1.82289	-0.988119	0	7	CObs(ug/mL)	0
	60	76	4	805.866	1162.94	1090	-72.94		1	-0.523674	-1.90559	-1.59683	0	7	CObs(ug/mL)	0
	60	77	5	636.239	996.46	825	-171.46		1	-1.231	-1.75028	-2.1568	0	7	CObs(ug/mL)	0
	60	78	6	502.317	853.812	706	-147.812		1	-1.06122	-0.908167	-1.57878	0	7	CObs(ug/mL)	0
	60	80	8	313.108	626.855	724	97.1449		1	0.697455	1.02176	0.285811	0	7	CObs(ug/mL)	0
	60	82	10	195.168	460.227	335	-125.227		1	-0.89907	-0.547499	-1.20757	0	7	CObs(ug/mL)	0
	60	84	12	121.653	337.891	223	-114.891		1	-0.824865	-0.377661	-0.901442	0	7	CObs(ug/mL)	0
	61	72	0	182.48	229.01	299	69.9897		1	0.502493	0.190195	0.170774	0	7	CObs(ug/mL)	0
	61	72.5	0.5	702.307	741.202	888	146.798		1	1.05394	0.275017	0.257417	0	7	CObs(ug/mL)	0
	61	73	1	1164.2	1200.98	1210	9.02232		1	0.064776	-0.643854	-0.63408	0	7	CObs(ug/mL)	0
	61	73.5	1.5	1574.61	1613.7	1670	56.2984		1	0.404196	0.0313162	0.0578927	0	7	CObs(ug/mL)	0
	61	74	2	1939.27	1984.19	2300	315.811		1	2.26737	1.29517	1.31984	0	7	CObs(ug/mL)	0
	61	74.5	2.5	1723.13	1781.13	1630	-151.134		1	-1.08507	-2.05316	-2.031	0	7	CObs(ug/mL)	0
	61	75	3	1531.07	1598.86	1220	-378.859		1	-2.72003	-2.67967	-2.82218	0	7	CObs(ug/mL)	0
	61	76	4	1208.8	1288.36	1230	-58.3605		1	-0.419001	0.507924	0.218729	0	7	CObs(ug/mL)	0
	61	77	5	954.359	1038.16	1080	41.8392		1	0.300386	1.03982	0.858169	0	7	CObs(ug/mL)	0
	61	78	6	753.476	836.55	863	26.4502		1	0.1899	0.622932	0.511663	0	7	CObs(ug/mL)	0
	61	80	8	469.661	543.183	564	20.8169		1	0.149456	0.421273	0.339622	0	7	CObs(ug/mL)	0
	61	82	10	292.752	352.696	306	-46.6961		1	-0.335256	-0.128336	-0.187428	0	7	CObs(ug/mL)	0
	61	84	12	182.48	229.01	394	164.99		1	1.18455	1.30384	1.25083	0	7	CObs(ug/mL)	0
	62	72	0	130.343	187.529	571	383.471		1	2.75314	0.982904	0.789117	0	7	CObs(ug/mL)	0
	62	72.5	0.5	501.648	580.776	564	-16.7763		1	-0.120446	-0.411341	-0.497411	0	7	CObs(ug/mL)	0
	62	73	1	831.569	934.727	1070	135.273		1	0.971196	1.29764	1.33741	0	7	CObs(ug/mL)	0
	62	73.5	1.5	1124.72	1253.31	1240	-13.3075		1	-0.0955419	-0.0475735	0.0325431	0	7	CObs(ug/mL)	0
	62	74	2	1385.19	1540.05	1500	-40.0526		1	-0.287559	-0.0751994	0.0584706	0	7	CObs(ug/mL)	0
	62	74.5	2.5	1230.81	1386.16	1470	83.8438		1	0.601959	-0.163271	0.0981612	0	7	CObs(ug/mL)	0
	62	75	3	1093.62	1247.64	1240	-7.63858		1	-0.0548414	-1.30771	-1.05679	0	7	CObs(ug/mL)	0
	62	76	4	863.428	1010.75	954	-56.746		1	-0.40741	-1.71477	-1.66607	0	7	CObs(ug/mL)	0
	62	77	5	681.685	818.833	734	-84.8329		1	-0.60906	-1.33478	-1.45914	0	7	CObs(ug/mL)	0
	62	78	6	538.197	663.359	599	-64.3588		1	-0.462066	-0.760203	-0.904131	0	7	CObs(ug/mL)	0
	62	80	8	335.472	435.367	387	-48.3665		1	-0.347249	-0.433546	-0.560129	0	7	CObs(ug/mL)	0
	62	82	10	209.109	285.734	234	-51.7337		1	-0.371424	-0.358427	-0.450761	0	7	CObs(ug/mL)	0
	62	84	12	130.343	187.529	150	-37.5288		1	-0.269439	-0.219295	-0.285247	0	7	CObs(ug/mL)	0
	63	72	0	199.859	290.618	402	111.382		1	0.79967	0.302566	0.266405	0	7	CObs(ug/mL)	0
	63	72.5	0.5	769.194	652.555	708	55.4449		1	0.398068	-0.318853	-0.449993	0	7	CObs(ug/mL)	0
	63	73	1	1275.07	985.198	1030	44.8021		1	0.321658	-0.051478	-0.107371	0	7	CObs(ug/mL)	0
	63	73.5	1.5	1724.57	1290.92	1300	9.0825		1	0.0652081	-0.189589	-0.139659	0	7	CObs(ug/mL)	0
	63	74	2	2123.96	1571.89	1540	-31.8929		1	-0.228976	-0.34783	-0.20155	0	7	CObs(ug/mL)	0
	63	74.5	2.5	1887.24	1444.67	1470	25.3321		1	0.181872	-0.297203	0.0648462	0	7	CObs(ug/mL)	0
	63	75	3	1676.89	1327.74	1320	-7.7402		1	-0.055571	-0.70933	-0.307924	0	7	CObs(ug/mL)	0
	63	76	4	1323.92	1121.51	1080	-41.5103		1	-0.298024	-0.884477	-0.660016	0	7	CObs(ug/mL)	0
	63	77	5	1045.25	947.313	953	5.68722		1	0.0408316	-0.281639	-0.299024	0	7	CObs(ug/mL)	0
	63	78	6	825.236	800.172	758	-42.1723		1	-0.302778	-0.438569	-0.556943	0	7	CObs(ug/mL)	0
	63	80	8	514.391	570.905	532	-38.905		1	-0.279319	-0.208034	-0.407995	0	7	CObs(ug/mL)	0
	63	82	10	320.633	407.328	380	-27.3279		1	-0.196201	-0.0254863	-0.236695	0	7	CObs(ug/mL)	0
	63	84	12	199.859	290.619	280	-10.6193		1	-0.0762414	0.126751	-0.0826464	0	7	CObs(ug/mL)	0
	64	72	0	130.343	169.096	279	109.904		1	0.789057	0.331586	0.278281	0	7	CObs(ug/mL)	0
	64	72.5	0.5	501.648	604.864	609	4.13637		1	0.0296972	0.107496	0.0950762	0	7	CObs(ug/mL)	0
	64	73	1	831.569	993.714	1010	16.2856		1	0.116923	0.325904	0.325098	0	7	CObs(ug/mL)	0
	64	73.5	1.5	1124.72	1340.7	1450	109.3		1	0.784724	0.616691	0.617913	0	7	CObs(ug/mL)	0
	64	74	2	1385.19	1650.33	1640	-10.3272		1	-0.0741441	-0.390362	-0.383031	0	7	CObs(ug/mL)	0
	64	74.5	2.5	1230.81	1472.65	1450	-22.6456		1	-0.162584	-0.497822	-0.484531	0	7	CObs(ug/mL)	0
	64	75	3	1093.62	1314.09	1260	-54.094		1	-0.388369	-0.656377	-0.659375	0	7	CObs(ug/mL)	0
	64	76	4	863.428	1046.36	1010	-36.364		1	-0.261077	-0.385098	-0.413635	0	7	CObs(ug/mL)	0
	64	77	5	681.685	833.181	815	-18.1807		1	-0.130528	-0.125288	-0.15464	0	7	CObs(ug/mL)	0
	64	78	6	538.197	663.431	638	-25.4307		1	-0.18258	-0.118543	-0.14054	0	7	CObs(ug/mL)	0
	64	80	8	335.472	420.638	471	50.3622		1	0.361577	0.390362	0.372796	0	7	CObs(ug/mL)	0
	64	82	10	209.109	266.699	243	-23.6988		1	-0.170146	-0.17226	-0.186231	0	7	CObs(ug/mL)	0
	64	84	12	130.343	169.096	168	-1.09619		1	-0.0078701	0.00165936	-0.00824688	0	7	CObs(ug/mL)	0
	65	72	0	139.032	215.334	301	85.6658		1	0.61504	0.340693	0.263494	0	7	CObs(ug/mL)	0
	65	72.5	0.5	535.091	733.951	905	171.049		1	1.22805	0.793273	0.649289	0	7	CObs(ug/mL)	0
	65	73	1	887.007	1198.05	1240	41.9471		1	0.30116	-0.452834	-0.521052	0	7	CObs(ug/mL)	0
	65	73.5	1.5	1199.7	1613.37	1670	56.629		1	0.406569	-0.0834652	-0.0818035	0	7	CObs(ug/mL)	0
	65	74	2	1477.54	1985.03	2150	164.967		1	1.18439	0.467911	0.486531	0	7	CObs(ug/mL)	0
	65	74.5	2.5	1312.86	1776.38	1600	-176.376		1	-1.2663	-1.95121	-1.93695	0	7	CObs(ug/mL)	0
	65	75	3	1166.53	1589.65	1420	-169.653		1	-1.21803	-1.36888	-1.43236	0	7	CObs(ug/mL)	0
	65	76	4	920.99	1273.02	1260	-13.0246		1	-0.0935101	0.0904375	-0.0383085	0	7	CObs(ug/mL)	0
	65	77	5	727.131	1019.46	1030	10.5374		1	0.0756534	0.226902	0.12836	0	7	CObs(ug/mL)	0
	65	78	6	574.077	816.405	814	-2.40533		1	-0.0172691	0.081896	0.0110102	0	7	CObs(ug/mL)	0
	65	80	8	357.837	523.57	456	-67.5702		1	-0.485122	-0.344486	-0.395468	0	7	CObs(ug/mL)	0
	65	82	10	223.049	335.772	347	11.2284		1	0.0806148	0.223866	0.189131	0	7	CObs(ug/mL)	0
	65	84	12	139.032	215.334	313	97.6658		1	0.701194	0.769373	0.738114	0	7	CObs(ug/mL)	0
	66	72	0	130.343	130.138	190	59.8619		1	0.42978	0.133068	0.127402	0	7	CObs(ug/mL)	0
	66	72.5	0.5	501.648	552.634	432	-120.634		1	-0.866095	-0.278477	-0.23874	0	7	CObs(ug/mL)	0
	66	73	1	831.569	925.94	936	10.0599		1	0.0722251	0.842944	0.854871	0	7	CObs(ug/mL)	0
	66	73.5	1.5	1124.72	1255.78	1280	24.2166		1	0.173864	0.420258	0.420145	0	7	CObs(ug/mL)	0
	66	74	2	1385.19	1547.22	1610	62.7759		1	0.450701	0.398684	0.40141	0	7	CObs(ug/mL)	0
	66	74.5	2.5	1230.81	1367.09	1360	-7.08586		1	-0.0508732	-0.15088	-0.149461	0	7	CObs(ug/mL)	0
	66	75	3	1093.62	1207.92	1160	-47.9205		1	-0.344047	-0.314965	-0.303778	0	7	CObs(ug/mL)	0
	66	76	4	863.428	943.026	906	-37.0256		1	-0.265826	-0.0585703	-0.0390541	0	7	CObs(ug/mL)	0
	66	77	5	681.685	736.222	757	20.7783		1	0.149179	0.336903	0.344828	0	7	CObs(ug/mL)	0
	66	78	6	538.197	574.77	593	18.2305		1	0.130886	0.210796	0.211778	0	7	CObs(ug/mL)	0
	66	80	8	335.472	350.319	338	-12.3192		1	-0.0884462	-0.0382853	-0.0404364	0	7	CObs(ug/mL)	0
	66	82	10	209.109	213.518	227	13.4821		1	0.0967954	0.134338	0.1311	0	7	CObs(ug/mL)	0
	66	84	12	130.343	130.138	163	32.8619		1	0.235933	0.247531	0.245446	0	7	CObs(ug/mL)	0
	67	72	0	191.17	388.05	401	12.9504		1	0.0929774	0.32769	0.261967	0	7	CObs(ug/mL)	0
	67	72.5	0.5	735.751	840.11	730	-110.11		1	-0.790538	-0.224935	-0.324667	0	7	CObs(ug/mL)	0
	67	73	1	1219.63	1256.65	1220	-36.647		1	-0.263108	0.469895	0.472611	0	7	CObs(ug/mL)	0
	67	73.5	1.5	1649.59	1640.45	1640	-0.452206		1	-0.00324663	0.330951	0.370495	0	7	CObs(ug/mL)	0
	67	74.5	2.5	1805.18	1837.4	1880	42.6005		1	0.305851	0.241704	0.431925	0	7	CObs(ug/mL)	0
	67	75	3	1603.98	1693.01	1740	46.9851		1	0.337331	0.114758	0.36963	0	7	CObs(ug/mL)	0
	67	76	4	1266.36	1437.39	1400	-37.3918		1	-0.268455	-0.437462	-0.143663	0	7	CObs(ug/mL)	0
	67	77	5	999.805	1220.36	1210	-10.3644		1	-0.0744114	-0.0451235	0.136907	0	7	CObs(ug/mL)	0
	67	78	6	789.356	1036.11	1070	33.8947		1	0.243348	0.297624	0.412275	0	7	CObs(ug/mL)	0
	67	80	8	492.026	746.849	672	-74.8487		1	-0.537378	-0.34097	-0.341088	0	7	CObs(ug/mL)	0
	67	82	10	306.693	538.346	652	113.654		1	0.815983	1.05563	0.940835	0	7	CObs(ug/mL)	0
	67	84	12	191.17	388.052	395	6.94781		1	0.049882	0.264804	0.0546209	0	7	CObs(ug/mL)	0
	69	72	0	199.859	308.196	334	25.8037		1	0.185259	0.200783	0.172948	0	7	CObs(ug/mL)	0
	69	72.5	0.5	769.194	837.937	723	-114.937		1	-0.825197	-0.222619	-0.258401	0	7	CObs(ug/mL)	0
	69	73	1	1275.07	1318.64	1480	161.36		1	1.15849	1.23046	1.22737	0	7	CObs(ug/mL)	0
	69	73.5	1.5	1724.57	1754.84	1680	-74.8436		1	-0.537341	-0.883469	-0.873462	0	7	CObs(ug/mL)	0
	69	74	2	2123.96	2150.67	2310	159.333		1	1.14393	0.78234	0.803292	0	7	CObs(ug/mL)	0
	69	74.5	2.5	1887.24	1951.58	1840	-111.578		1	-0.801079	-1.0772	-1.06108	0	7	CObs(ug/mL)	0
	69	75	3	1676.89	1770.92	1750	-20.919		1	-0.150188	-0.0942844	-0.135005	0	7	CObs(ug/mL)	0
	69	76	4	1323.92	1458.22	1380	-78.2236		1	-0.561609	-0.203208	-0.306609	0	7	CObs(ug/mL)	0
	69	77	5	1045.25	1200.74	1180	-20.7417		1	-0.148915	0.327078	0.234808	0	7	CObs(ug/mL)	0
	69	78	6	825.236	988.724	989	0.276105		1	0.0019823	0.392075	0.335142	0	7	CObs(ug/mL)	0
	69	80	8	514.391	670.388	712	41.6125		1	0.298758	0.580925	0.517737	0	7	CObs(ug/mL)	0
	69	82	10	320.633	454.545	470	15.4551		1	0.11096	0.30447	0.223791	0	7	CObs(ug/mL)	0
	69	84	12	199.859	308.197	386	77.8035		1	0.558592	0.694488	0.596721	0	7	CObs(ug/mL)	0
	70	72	0	121.653	112.616	139	26.3841		1	0.189425	0.0411632	0.0422809	0	7	CObs(ug/mL)	0
	70	72.5	0.5	468.205	482.814	337	-145.814		1	-1.04687	-0.419645	-0.397948	0	7	CObs(ug/mL)	0
	70	73	1	776.131	809.734	689	-120.734		1	-0.866815	0.40339	0.4175	0	7	CObs(ug/mL)	0
	70	73.5	1.5	1049.74	1098.44	1100	1.56275		1	0.0112198	0.928652	0.93689	0	7	CObs(ug/mL)	0
	70	74	2	1292.85	1353.39	1390	36.6097		1	0.262841	0.679815	0.695088	0	7	CObs(ug/mL)	0
	70	74.5	2.5	1148.75	1195.18	1270	74.824		1	0.537201	0.727919	0.729854	0	7	CObs(ug/mL)	0
	70	75	3	1020.72	1055.46	1060	4.5426		1	0.0326137	0.132291	0.10536	0	7	CObs(ug/mL)	0
	70	76	4	805.866	823.111	858	34.8891		1	0.250487	0.286024	0.236864	0	7	CObs(ug/mL)	0
	70	77	5	636.239	641.913	608	-33.9128		1	-0.243478	-0.221692	-0.262414	0	7	CObs(ug/mL)	0
	70	78	6	502.317	500.603	548	47.3967		1	0.340286	0.345502	0.316357	0	7	CObs(ug/mL)	0
	70	80	8	313.108	304.459	281	-23.4592		1	-0.168426	-0.193144	-0.215691	0	7	CObs(ug/mL)	0
	70	82	10	195.168	185.167	186	0.832668		1	0.00597816	0.00680607	-0.0110438	0	7	CObs(ug/mL)	0
	70	84	12	121.653	112.616	91	-21.6159		1	-0.155192	-0.146991	-0.16136	0	7	CObs(ug/mL)	0
	73	72	0	104.274	143.758	241	97.2423		1	0.698154	0.37127	0.315322	0	7	CObs(ug/mL)	0
	73	72.5	0.5	401.318	454.878	828	373.122		1	2.67884	1.24004	1.13548	0	7	CObs(ug/mL)	0
	73	73	1	665.255	734.541	793	58.4588		1	0.419707	-1.45525	-1.47449	0	7	CObs(ug/mL)	0
	73	73.5	1.5	899.775	985.929	1010	24.071		1	0.172818	-0.737277	-0.680723	0	7	CObs(ug/mL)	0
	73	74	2	1108.16	1211.9	1180	-31.8999		1	-0.229026	-0.681803	-0.582784	0	7	CObs(ug/mL)	0
	73	74.5	2.5	984.644	1089.37	1070	-19.3689		1	-0.139059	-0.857548	-0.729618	0	7	CObs(ug/mL)	0
	73	75	3	874.9	979.227	893	-86.2265		1	-0.619066	-1.36321	-1.31092	0	7	CObs(ug/mL)	0
	73	76	4	690.742	791.224	733	-58.2243		1	-0.418023	-0.994149	-1.11081	0	7	CObs(ug/mL)	0
	73	77	5	545.348	639.317	627	-12.3167		1	-0.088428	-0.391544	-0.562857	0	7	CObs(ug/mL)	0
	73	78	6	430.558	516.574	450	-66.5739		1	-0.477969	-0.584449	-0.733602	0	7	CObs(ug/mL)	0
	73	80	8	268.378	337.26	320	-17.2604		1	-0.123922	-0.103634	-0.224733	0	7	CObs(ug/mL)	0
	73	82	10	167.287	220.19	207	-13.1903		1	-0.0947003	-0.0547661	-0.144477	0	7	CObs(ug/mL)	0
	73	84	12	104.274	143.758	107	-36.7577		1	-0.263903	-0.214019	-0.278939	0	7	CObs(ug/mL)	0
	74	72	0	130.343	55.5402	161	105.46		1	0.757151	0.0683819	0.192178	0	7	CObs(ug/mL)	0
	74	72.5	0.5	501.648	416.457	410	-6.45734		1	-0.0463607	-0.302466	-0.238503	0	7	CObs(ug/mL)	0
	74	73	1	831.569	725.741	727	1.25876		1	0.00903731	0.171775	0.139415	0	7	CObs(ug/mL)	0
	74	73.5	1.5	1124.72	990.779	939	-51.7786		1	-0.371746	-0.0922279	-0.173263	0	7	CObs(ug/mL)	0
	74	74	2	1385.19	1217.9	1270	52.1006		1	0.374058	0.541731	0.420668	0	7	CObs(ug/mL)	0
	74	74.5	2.5	1230.81	1043.67	1030	-13.6652		1	-0.09811	-0.36433	-0.546943	0	7	CObs(ug/mL)	0
	74	75	3	1093.62	894.357	919	24.6428		1	0.176923	-0.229895	-0.269141	0	7	CObs(ug/mL)	0
	74	76	4	863.428	656.766	628	-28.766		1	-0.206526	-0.639009	-0.535507	0	7	CObs(ug/mL)	0
	74	77	5	681.685	482.292	538	55.7078		1	0.399956	0.0624435	0.168354	0	7	CObs(ug/mL)	0
	74	78	6	538.197	354.168	216	-138.168		1	-0.991984	-1.10885	-1.06191	0	7	CObs(ug/mL)	0
	74	80	8	335.472	190.989	252	61.0107		1	0.438028	0.495482	0.475344	0	7	CObs(ug/mL)	0
	74	82	10	209.109	102.993	80.1	-22.8931		1	-0.164362	-0.120532	-0.160862	0	7	CObs(ug/mL)	0
	74	84	12	130.343	55.5402	80.8	25.2598		1	0.181353	0.23953	0.184874	0	7	CObs(ug/mL)	0
	75	72	0	112.964	248.118	246	-2.11779		1	-0.0152047	0.337048	0.262956	0	7	CObs(ug/mL)	0
	75	72.5	0.5	434.762	696.258	990	293.742		1	2.10893	1.57955	1.21006	0	7	CObs(ug/mL)	0
	75	73	1	720.693	1102.1	962	-140.097		1	-1.00583	-1.75212	-1.91225	0	7	CObs(ug/mL)	0
	75	73.5	1.5	974.756	1469.63	1480	10.3731		1	0.0744739	0.230187	0.271235	0	7	CObs(ug/mL)	0
	75	74	2	1200.5	1802.46	1690	-112.465		1	-0.807443	-0.513208	-0.424757	0	7	CObs(ug/mL)	0
	75	74.5	2.5	1066.7	1632.32	1760	127.676		1	0.916654	0.800586	0.94718	0	7	CObs(ug/mL)	0
	75	75	3	947.808	1478.24	1510	31.7568		1	0.227999	-0.296986	-0.111078	0	7	CObs(ug/mL)	0
	75	76	4	748.304	1212.34	1190	-22.3417		1	-0.160403	-0.783363	-0.684691	0	7	CObs(ug/mL)	0
	75	77	5	590.794	994.27	893	-101.27		1	-0.727068	-0.983096	-1.03013	0	7	CObs(ug/mL)	0
	75	78	6	466.437	815.424	924	108.576		1	0.779527	0.617525	0.538919	0	7	CObs(ug/mL)	0
	75	80	8	290.743	548.456	487	-61.4558		1	-0.441223	-0.594351	-0.689331	0	7	CObs(ug/mL)	0
	75	82	10	181.228	368.893	333	-35.8925		1	-0.257691	-0.276495	-0.360546	0	7	CObs(ug/mL)	0
	75	84	12	112.964	248.118	188	-60.1179		1	-0.431618	-0.390931	-0.460021	0	7	CObs(ug/mL)	0
	101	75	3	1166.53	1241.63	1242	0.368044		1	0.00264238	0.0873834	0.08472	0	7	CObs(ug/mL)	0
	101	78	6	574.077	659.891	662	2.10945		1	0.0151449	0.0674443	0.064937	0	7	CObs(ug/mL)	0
	102	74	2	1200.5	2006.94	1932	-74.9407		1	-0.538039	0.832788	0.663546	0	7	CObs(ug/mL)	0
	102	75	3	947.808	1626.81	1764	137.186		1	0.984932	0.867992	0.588601	0	7	CObs(ug/mL)	0
	102	78	6	466.437	866.459	806	-60.4586		1	-0.434064	-0.974507	-1.10462	0	7	CObs(ug/mL)	0
	105	74	2	1662.23	1994.58	2060	65.4247		1	0.469718	0.32904	0.304083	0	7	CObs(ug/mL)	0
	105	75	3	1312.35	1635.87	1536	-99.8731		1	-0.717042	-0.122641	-0.150812	0	7	CObs(ug/mL)	0
	105	78	6	645.837	902.5	944	41.5002		1	0.297952	0.920911	0.894374	0	7	CObs(ug/mL)	0
	105	82	10	250.93	408.361	416	7.63945		1	0.0548476	0.152868	0.0734321	0	7	CObs(ug/mL)	0
	106	74	2	1662.23	1484.19	1536	51.8141		1	0.372	-0.104422	-0.107309	0	7	CObs(ug/mL)	0
	106	75	3	1312.35	1194.34	1106	-88.339		1	-0.634232	-0.254242	-0.29166	0	7	CObs(ug/mL)	0
	106	78	6	645.837	622.366	658	35.6345		1	0.255839	0.744561	0.729636	0	7	CObs(ug/mL)	0
	106	82	10	250.93	260.977	270	9.02271		1	0.0647788	0.101037	0.0833612	0	7	CObs(ug/mL)	0
	108	74	2	1939.27	1389.36	1320	-69.3615		1	-0.497983	-0.439866	-0.524545	0	7	CObs(ug/mL)	0
	108	75	3	1531.07	1155.36	1258	102.64		1	0.73691	0.311649	0.538714	0	7	CObs(ug/mL)	0
	108	78	6	753.476	664.39	602	-62.3895		1	-0.447927	-0.894052	-0.794253	0	7	CObs(ug/mL)	0
	108	82	10	292.752	317.71	340	22.2904		1	0.160035	0.236037	0.219241	0	7	CObs(ug/mL)	0
	110	74	2	1569.89	1986.38	2020	33.615		1	0.24134	0.393928	0.354723	0	7	CObs(ug/mL)	0
	110	75	3	1239.44	1624.12	1576	-48.1151		1	-0.345444	0.0452595	0.0103257	0	7	CObs(ug/mL)	0
	110	78	6	609.957	887.722	910	22.2781		1	0.159946	0.492696	0.463319	0	7	CObs(ug/mL)	0
	110	82	10	236.99	396.726	400	3.27418		1	0.0235071	0.0902455	0.0312765	0	7	CObs(ug/mL)	0
	118	74	2	1477.54	2173.21	2260	86.7878		1	0.623095	0.726892	0.625929	0	7	CObs(ug/mL)	0
	118	75	3	1166.53	1853.03	1742	-111.028		1	-0.797127	0.0623557	-0.115941	0	7	CObs(ug/mL)	0
	118	78	6	574.077	1148.74	1156	7.26129		1	0.0521326	1.09893	0.969971	0	7	CObs(ug/mL)	0
	118	82	10	223.049	607.212	648	40.788		1	0.292838	0.757726	0.427451	0	7	CObs(ug/mL)	0
	122	74	2	1015.81	2583.37	2660	76.6343		1	0.550198	2.20125	1.14728	0	7	CObs(ug/mL)	0
	122	75	3	801.991	1265.48	1096	-169.477		1	-1.21677	-2.68532	-1.05252	0	7	CObs(ug/mL)	0
	122	78	6	394.678	148.751	480	331.249		1	2.37821	2.97445	2.65567	0	7	CObs(ug/mL)	0
	126	74	2	1015.81	1732.21	1994	261.795		1	1.87956	1.3096	1.04131	0	7	CObs(ug/mL)	0
	126	75	3	801.991	1536.4	1152	-384.402		1	-2.75983	-1.0374	-1.59629	0	7	CObs(ug/mL)	0
	126	78	6	394.678	1072.07	1220	147.933		1	1.06209	3.51985	3.08021	0	7	CObs(ug/mL)	0
	129	75	3	1093.62	2128.18	2140	11.8237		1	0.0848887	1.29006	0.916313	0	7	CObs(ug/mL)	0
	129	78	6	538.197	1252.6	1252	-0.603144		1	-0.00433029	0.0739046	-0.0287109	0	7	CObs(ug/mL)	0
	130	75	3	1239.44	1207.47	1208	0.529411		1	0.00380092	-0.0343154	-0.035374	0	7	CObs(ug/mL)	0
	130	78	6	609.957	552.055	550	-2.05476		1	-0.0147522	-0.0644325	-0.0646953	0	7	CObs(ug/mL)	0
	131	74	2	1108.16	1785.05	1846	60.9451		1	0.437557	0.908034	0.723476	0	7	CObs(ug/mL)	0
	131	75	3	874.9	1484.42	1432	-52.4239		1	-0.376379	0.137204	0.0105181	0	7	CObs(ug/mL)	0
	131	78	6	430.558	853.644	798	-55.6443		1	-0.3995	0.416771	0.373787	0	7	CObs(ug/mL)	0
	131	82	10	167.287	408.228	496	87.7724		1	0.630165	0.982057	0.867166	0	7	CObs(ug/mL)	0
	132	74	2	1600.67	2178.55	2260	81.4481		1	0.584759	0.566093	0.474702	0	7	CObs(ug/mL)	0
	132	75	3	1263.74	1613.06	1476	-137.058		1	-0.984015	-0.563385	-0.334524	0	7	CObs(ug/mL)	0
	132	78	6	621.917	654.782	738	83.2181		1	0.597467	1.19103	1.23093	0	7	CObs(ug/mL)	0
	134	74	2	1677.62	2177.45	2280	102.554		1	0.736292	0.493784	0.423158	0	7	CObs(ug/mL)	0
	134	75	3	1324.5	1687.05	1518	-169.051		1	-1.2137	-0.496411	-0.356044	0	7	CObs(ug/mL)	0
	134	78	6	651.816	784.64	876	91.3599		1	0.655921	1.46247	1.50662	0	7	CObs(ug/mL)	0
	135	75	3	947.808	1300.88	1306	5.11601		1	0.0367305	0.507079	0.436688	0	7	CObs(ug/mL)	0
	135	78	6	466.437	789.068	794	4.93154		1	0.0354061	0.20609	0.143728	0	7	CObs(ug/mL)	0
	136	75	3	1385.26	1908.29	1908	-0.287797		1	-0.00206625	0.511652	0.449406	0	7	CObs(ug/mL)	0
	136	78	6	681.716	1278.22	1286	7.78353		1	0.0558821	0.387436	0.285256	0	7	CObs(ug/mL)	0
	137	75	3	1166.53	1191.3	1160	-31.3021		1	-0.224734	-0.00756452	0.0615646	0	7	CObs(ug/mL)	0
	137	78	6	574.077	889.176	926	36.8237		1	0.264377	0.612943	0.732339	0	7	CObs(ug/mL)	0
	141	75	3	1093.62	1434.6	1442	7.39584		1	0.0530986	0.429508	0.37579	0	7	CObs(ug/mL)	0
	141	78	6	538.197	752.722	752	-0.72201		1	-0.00518369	-0.0189302	-0.0255419	0	7	CObs(ug/mL)	0
	142	75	3	874.9	1705.97	1722	16.0251		1	0.115053	1.29478	0.922843	0	7	CObs(ug/mL)	0
	142	78	6	430.558	946.455	944	-2.4545		1	-0.0176222	-0.0506464	-0.0990566	0	7	CObs(ug/mL)	0
	143	75	3	1749.8	1511.07	1504	-7.06908		1	-0.0507527	-0.191127	-0.206189	0	7	CObs(ug/mL)	0
	143	78	6	861.115	831.008	836	4.99178		1	0.0358386	0.15965	0.180546	0	7	CObs(ug/mL)	0
	144	75	3	947.808	1141.69	1132	-9.69043		1	-0.0695727	0.260754	0.263425	0	7	CObs(ug/mL)	0
	144	78	6	466.437	785.146	804	18.8539		1	0.135362	0.456961	0.419975	0	7	CObs(ug/mL)	0
	145	75	3	437.45	1242.82	1284	41.1831		1	0.295675	2.42806	1.43513	0	7	CObs(ug/mL)	0
	145	78	6	215.279	534.12	516	-18.1203		1	-0.130095	-0.645597	-0.588971	0	7	CObs(ug/mL)	0
	146	75	3	1749.8	1414.91	1406	-8.90789		1	-0.0639544	-0.267329	-0.297688	0	7	CObs(ug/mL)	0
	146	78	6	861.115	757.069	762	4.9311		1	0.035403	0.148158	0.170487	0	7	CObs(ug/mL)	0
	147	74	2	1569.89	1724.37	1728	3.63047		1	0.026065	0.138377	0.131896	0	7	CObs(ug/mL)	0
	147	75	3	1239.44	1355.12	1356	0.876585		1	0.00629347	0.0121099	0.0126973	0	7	CObs(ug/mL)	0
	147	78	6	609.957	657.695	646	-11.6947		1	-0.0839628	-0.0318854	-0.0313354	0	7	CObs(ug/mL)	0
	147	82	10	236.99	250.852	266	15.1475		1	0.108752	0.134688	0.134554	0	7	CObs(ug/mL)	0
	149	74	2	1385.19	1525.75	1544	18.2546		1	0.131059	0.157182	0.168401	0	7	CObs(ug/mL)	0
	149	75	3	1093.62	1285	1256	-28.9994		1	-0.208202	0.129055	0.0904989	0	7	CObs(ug/mL)	0
	149	78	6	538.197	767.654	786	18.3461		1	0.131716	0.399107	0.348335	0	7	CObs(ug/mL)	0
	153	74	2	1569.89	1619.58	1634	14.4196		1	0.103526	0.0561104	0.0711458	0	7	CObs(ug/mL)	0
	153	75	3	1239.44	1361.13	1336	-25.129		1	-0.180414	0.117023	0.101232	0	7	CObs(ug/mL)	0
	153	78	6	609.957	807.959	824	16.0406		1	0.115164	0.344937	0.307107	0	7	CObs(ug/mL)	0
	154	75	3	1385.26	1872.43	1880	7.56804		1	0.054335	0.484246	0.415523	0	7	CObs(ug/mL)	0
	154	78	6	681.716	910.62	908	-2.61961		1	-0.0188075	-0.140301	-0.123205	0	7	CObs(ug/mL)	0
	156	74	2	1477.54	2305.44	2320	14.5613		1	0.104543	0.782631	0.635204	0	7	CObs(ug/mL)	0
	156	75	3	1166.53	1895.77	1882	-13.7651		1	-0.0988267	0.296602	0.174716	0	7	CObs(ug/mL)	0
	156	78	6	574.077	1054.09	1064	9.91094		1	0.0711558	0.265298	0.189857	0	7	CObs(ug/mL)	0

## Sheet: History
Object	Timestamp	User	Object Name	Event	Description	Annotation
Busulfan_1104.Workflow.Model.Results.Residuals	2019.10.01 07:21:01 UTC	hjj	Worksheet	Object Created	Object Created
Busulfan_1104.Workflow.Model.Results.Residuals	2019.10.01 07:21:10 UTC	hjj	Residuals	Result creation	Object created as a result by Busulfan_1104.Workflow.Model
